# Supplementary material for: Mystery shopping and coaching as a form of audit and feedback to improve community pharmacy management of non-prescription medicine requests: an intervention study
Source: PubMed Central journal article supplement — BMJ Open. 2017 Dec 14;7(12):e019462. doi: 10.1136/bmjopen-2017-019462 (PMC5735410; doi:10.1136/bmjopen-2017-019462), 2017-12-14
Supplement: bmjopen-2017-019462.draft_revisions.pdf [file bmjopen-2017-019462.draft_revisions.pdf]

# BMJ Open

BMJ Open is committed to open peer review. As part of this commitment we make the peer review history of every article we publish publicly available.

When an article is published we post the peer reviewers' comments and the authors' responses online. We also post the versions of the paper that were used during peer review. These are the versions that the peer review comments apply to.

The versions of the paper that follow are the versions that were submitted during the peer review process. They are not the versions of record or the final published versions. They should not be cited or distributed as the published version of this manuscript.

BMJ Open is an open access journal and the full, final, typeset and author-corrected version of record of the manuscript is available on our site with no access controls, subscription charges or pay-per-view fees (<http://bmjopen.bmj.com>).

If you have any questions on BMJ Open's open peer review process please email [editorial.bmjopen@bmj.com](mailto:editorial.bmjopen@bmj.com)

# BMJ Open

## Mystery shopping and coaching as a form of audit and feedback to improve community pharmacy management of non-prescription medicine requests: an intervention study

|                                 |                                                                                                                                                                                                                                                                                                                                                                                                               |
|---------------------------------|---------------------------------------------------------------------------------------------------------------------------------------------------------------------------------------------------------------------------------------------------------------------------------------------------------------------------------------------------------------------------------------------------------------|
| Journal:                        | <i>BMJ Open</i>                                                                                                                                                                                                                                                                                                                                                                                               |
| Manuscript ID                   | bmjopen-2017-019462                                                                                                                                                                                                                                                                                                                                                                                           |
| Article Type:                   | Research                                                                                                                                                                                                                                                                                                                                                                                                      |
| Date Submitted by the Author:   | 05-Sep-2017                                                                                                                                                                                                                                                                                                                                                                                                   |
| Complete List of Authors:       | Collins, Jack; The University of Sydney, Faculty of Pharmacy<br>Schneider, Carl; The University of Sydney, Faculty of Pharmacy<br>Naughtin, Clare; The University of Sydney, Faculty of Pharmacy<br>Wilson, Frances; The University of Sydney, Faculty of Pharmacy<br>de Almeida Neto, Abilio; The University of Sydney, Faculty of Pharmacy<br>Moles, Rebekah; The University of Sydney, Faculty of Pharmacy |
| <b>Primary Subject Heading</b>: | Medical education and training                                                                                                                                                                                                                                                                                                                                                                                |
| Secondary Subject Heading:      | Evidence based practice, Health services research                                                                                                                                                                                                                                                                                                                                                             |
| Keywords:                       | pharmacy, simulated patient, community pharmacy, minor ailment, nonprescription medicine, standardized patient                                                                                                                                                                                                                                                                                                |
|                                 |                                                                                                                                                                                                                                                                                                                                                                                                               |

SCHOLARONE™  
Manuscripts

1  
2  
3 Mystery shopping and coaching as a form of audit and feedback to improve  
4  
5  
6 community pharmacy management of non-prescription medicine requests: an  
7  
8 intervention study  
9  
10

11 Jack Charles Collins<sup>1,\*</sup>, Carl Richard Schneider<sup>1</sup>, Clare Louise Naughtin<sup>1</sup>, Frances Wilson<sup>1</sup>, Abilio  
12 Cesar de Almeida Neto<sup>1</sup>, Rebekah Jane Moles<sup>1</sup>  
13  
14

15  
16 <sup>1</sup> Faculty of Pharmacy, The University of Sydney, Sydney, Australia.  
17  
18

19 **Corresponding Author**

20  
21 \*Jack Charles Collins  
22  
23

24 E: jack.c.collins@sydney.edu.au  
25  
26

27 T: +61 2 9036 7187  
28  
29

30 Postal Address:  
31

32 Faculty of Pharmacy  
33

34 Pharmacy and Bank Building A15, Science Rd  
35  
36

37 The University of Sydney  
38  
39

40 NSW 2006  
41  
42

43 Australia  
44  
45  
46

47 **Word count:** 3589  
48  
49  
50  
51  
52  
53  
54  
55  
56  
57  
58  
59  
60

**ABSTRACT**

**Objectives:** To determine if repeated mystery shopping visits with feedback improve pharmacy performance over nine visits, and to determine what factors predict an appropriate outcome. **Design:** Prospective, parallel, repeated intervention, repeated measures mystery shopping (pseudo-patient) design. **Setting:** Thirty-six community pharmacies in metropolitan Sydney, Australia in March-October 2015. **Participants:** Sixty-one University of Sydney pharmacy undergraduates acted as mystery shoppers. Students enrolled in their third year of Bachelor of Pharmacy in 2015 were eligible to participate. Any community pharmacy in the Sydney metropolitan region was eligible to take part and were selected through convenience sampling. **Intervention:** Repeated mystery shopping with immediate feedback and coaching. **Outcome measures:** Outcome for each given scenario (appropriate or not) and questioning scores for each interaction. **Results:** 521 visits were analysed, 54% resulted in an appropriate outcome. Questioning scores and the proportion of interactions resulting in an appropriate outcome significantly improved over time ( $p<0.001$ ). Involvement of pharmacists, visit number, increased questioning score, and the prescribed scenario were predictors of an appropriate outcome ( $p=0.008$ ,  $p=0.022$ ,  $p<0.001$ , and  $p<0.001$  respectively). Interactions involving a pharmacist had greater scores than those without ( $p<0.001$ ). **Conclusions:** Repeated mystery shopping with feedback improved pharmacy performance over time. Future work should focus on the role of non-pharmacist staff and design interventions accordingly.

**Keywords:** pharmacy; standardized patient; simulated patient; community pharmacy; minor ailment; nonprescription medicine

## ARTICLE SUMMARY

### strengths and limitations of this study

- Large number of repeated mystery shopping visits (n=521)
- Examined 10 different minor ailment scenarios
- Thirty-six community pharmacies were mystery shopped
- Pharmacies were restricted to metropolitan Sydney, Australia
- Staff provided consent before mystery shopping visits occurred which may have influenced their handling of requests

## INTRODUCTION

It has been suggested that medicines are the most common form of medical intervention in the developed world.[1] In recent times, access to increasing numbers of medicines without a prescription is occurring due to the down-scheduling of a number of medicines from prescription-only to non-prescription (over-the-counter) status.[2-3] These regulatory changes can provide cost savings to insurers and governments,[4-5] facilitate patient self-care and self-medication,[6] open up greater opportunities for treatment, however, down-scheduling can also create potential for medication misadventure.[7-8]

Pharmacies are important locations for those seeking non-prescription medicines and are equipped to manage a wide variety of ailments.[9-10] As pharmacies can play a major role through the provision of medicines and advice giving, it is important that pharmacy staff are adherent to guidelines and provide their patients with evidence-based treatment and advice to ensure optimal health outcomes.

In Australia, the pharmacy workforce consists of pharmacists (either registered or graduate “intern” pharmacists) who have completed a bachelor’s or master’s qualification at university, and non-pharmacists (assistants, technicians) whose level of training is not regulated and may vary. As both pharmacists and non-pharmacists are permitted to engage in the sale of medicines and counseling

1  
2  
3 patients on their use, it is important that both parties are appropriately trained to carry out their duties  
4  
5 with respect to requests for non-prescription medicines.  
6

7  
8 Several intervention methods have been employed in the healthcare sector to improve practitioner  
9  
10 performance and adherence to guidelines.[11-12] Audit and feedback has been identified as a  
11  
12 commonly used and effective intervention method to change practitioner behaviour and improve the  
13  
14 quality of care provided.[13-15] In the context of pharmacy practice, a form of this method of  
15  
16 intervention that has been employed is that of mystery shopping with feedback.[16-17] This method  
17  
18 of intervention has been used in many minor ailment scenarios (vaginal thrush,[18] dyspepsia,[19-20],  
19  
20 asthma,[21] and headache[22]) and has been shown to be a feasible and acceptable method of  
21  
22 intervention for staff involved.[19, 23] Further to improving practice, this methodology has also been  
23  
24 employed to monitor and audit practice in the pharmacy setting.[24-25]  
25

26  
27 This method of intervention involves a mystery shopper (also known as a simulated patient, pseudo  
28  
29 patient, or secret shopper) entering a pharmacy and undertaking an interaction with a staff member.  
30  
31 The mystery shopper should be indistinguishable from a regular patient, generally has a set scenario  
32  
33 to follow, and may, but not always, be a professional actor.[16]  
34

35  
36 In this study repeated mystery shopping visits with feedback was employed as a coaching technique to  
37  
38 improve supply of non-prescription medicines for minor ailments in the community pharmacy setting.  
39  
40 Therefore the aim of this study was to use the method of mystery shopping with feedback to  
41  
42 determine if scores and proportions of individuals achieving an appropriate outcome for each scenario  
43  
44 changed over time and to determine what factors predict an appropriate outcome being achieved.  
45  
46  
47  
48  
49  
50  
51  
52  
53  
54  
55  
56  
57  
58  
59  
60

## **METHODS**

A prospective parallel, repeated intervention, repeated measures study design was employed to assess the impact of mystery shopping with feedback on community pharmacy practice in Sydney, Australia between March and October, 2015.

### **ethics**

Ethics for this study was submitted to and approved by the Human Research Ethics Committee at the University of Sydney (reference number 2014/186).

### **participants and setting**

Bachelor of Pharmacy (BPharm) students entering their third year of the degree program at the University of Sydney in 2015 were invited to take part in the study in lieu of a portion of their regular clinical placements program. In semester one (March-June) 30 third-year BPharm students consented to take part in the study and each recruited one community pharmacy (n=30) in the metropolitan region of Sydney, Australia. In semester two of the academic year (July-October), 29 third-year BPharm students were recruited, with 24 pharmacies from semester one repeating their participation, and a further six new community pharmacies joining the study. Two fourth-year honours students shared the role of being a mystery shopper to give a total of 31 students taking part in the second semester, and 61 across both semesters.

### **consent process and training**

Authorised representatives from each pharmacy, such as the pharmacy owner or manager, were asked to provide consent for the pharmacy to be used as a location for the study. Each individual staff member at the pharmacy was also invited to provide informed consent, including consent to audio-recording, prior to the study commencing. Pharmacy staff were informed of the timeline of the study

1  
2  
3 and that they would receive one visit each week from a student mystery shopper, but were not  
4 informed which scenario they were allocated or exactly when the visits would occur.  
5  
6

7 Recruited students provided informed consent to act as mystery shoppers and for audio-recording of  
8 each visit and feedback session to occur. Students were trained across a two-day program where they  
9 learned how to enact scenarios (through role-play with the research team), familiarised themselves  
10 with data collection sheets, were taught about theory behind the intervention, and trained in providing  
11 feedback to pharmacy staff.  
12  
13  
14  
15  
16

### 21 **mystery shopping visits and data collection**

22  
23  
24 After completing training, students presented once a week to a pre-allocated pharmacy for nine weeks  
25 with a direct product request for a non-prescription medicine e.g. “Can I get some Zantac<sup>®</sup>  
26 [ranitidine], please?” Each week students would visit a different pharmacy, each pharmacy was  
27 allocated a different scenario (one of 10) relating to a minor ailment. Scenarios included adult  
28 cough/cold, adult pain, allergic rhinitis, asthma, diarrhoea, dyspepsia, insomnia, paediatric  
29 cough/cold, paediatric fever, and smoking cessation. Scenarios variables were altered each visit,  
30 including who the medicine was for, what symptoms they were experiencing, the product requested, if  
31 the person was on any other therapy, and the legislative status of the product requested. In Australia,  
32 medicines available without a prescription are classified into three “schedules”. These are *Pharmacist*  
33 *Only* (a registered pharmacist (or graduate pharmacist) must *personally* hand the product to the  
34 individual requesting it), *Pharmacy Medicine* (can only be sold under the supervision of a registered  
35 pharmacist in a licensed premises), or unscheduled (general sale permitted in outlets such as  
36 supermarkets).[26] Exemplar particulars for each scenario have been previously published.[27]  
37  
38  
39  
40  
41  
42  
43  
44  
45  
46  
47  
48  
49

50  
51 Mystery shoppers requested the product from the first staff member they encountered and followed  
52 questioning, counselling and purchasing as directed by the staff member. After purchasing any  
53 products (where a product was sold), students exited the pharmacy and completed a scoresheet based  
54 on the audio recording of the interaction. Within five minutes students returned to the pharmacy,  
55  
56  
57  
58  
59  
60



1  
2  
3 provided the staff member with a blank copy of the scoresheet for self-evaluation and then provided  
4  
5 verbal feedback to the staff member based on their performance. Any products purchased were  
6  
7 returned to the pharmacy without refund.  
8

9  
10 Data collection sheets used in this study (one supplementary file 1) were based on the WHAT-STOP-  
11  
12 GO protocol[28] developed by the Pharmaceutical Society of Australia to aid pharmacy staff  
13  
14 (particularly non-pharmacist staff) in questioning individuals presenting with a request for non-  
15  
16 prescription medicines. This aide-mémoire includes the questions **Who** the medicine is for, **How long**  
17  
18 they have had the symptoms, what the **Actual** symptoms are, and if they are on any other **Treatments**  
19  
20 for this presentation or another condition. The scores for each of these key questions were aggregated  
21  
22 and classified as the “questioning” score. For each criterion, a score of yes (2 points), no (0 points),  
23  
24 partial (1 point) or not applicable was applied. Scores were then totalled and converted to a percentage  
25  
26 to account for any “not applicable” criteria. A maximum questioning score of 18 points was possible  
27  
28 depending on the scenario specifics. Other data were also recorded on the collection sheets such as the  
29  
30 provision of a product and any counselling on its use, referral to a medical practitioner, perceived  
31  
32 rapport, and the provision of written or verbal information the time and date of the visit, who served  
33  
34 the shopper, and space for any comments about the interaction. Scores were not calculated for non-  
35  
36 questioning aspects of interactions due to the range of possible responses based on the scenario  
37  
38 specifics and previous research demonstrating a relationship between questioning and appropriate  
39  
40 outcome.[18, 21]  
41

42  
43 Each scenario version had a given “appropriate outcome” or scenario angle that the pharmacy staff  
44  
45 member should have achieved based on the information presented in the scenario. The research team  
46  
47 decided upon this outcome, in concordance with current best practice guidelines. For example, in an  
48  
49 adult cough/cold scenario the staff member should have identified an interaction between a selective  
50  
51 serotonin re-uptake inhibitor and the cough suppressant dextromethorphan and appropriately  
52  
53 recommended an alternative product.[29]  
54  
55  
56  
57  
58  
59  
60

### **data collation and analysis**

Data collection sheets were checked for consistency and completeness and entered into Microsoft Excel 2016 for Windows (Microsoft Corp, Redmond, WA, USA). A random sample of 10% of recordings were audited by the first author (JCC) to determine the level of discrepancy between the scoring and data collection by the mystery shoppers. This proportion of recordings was selected as the value to audit based on existing literature in this field.[30]

Data were then imported into IBM SPSS Statistics 24.0 (SPSS Inc., Chicago, IL, USA) and descriptively analysed and tests for normality and homogeneity of data were performed. Pearson's chi-squared analyses were performed to determine if there was a relationship between pharmacist involvement in the interaction (either by directly serving the shopper or being consulted by a non-pharmacist staff member) and achieving the key outcome, and if there was a difference in the provision of written information between scenarios. Changes in median questioning scores over time were analysed using a Spearman's rank order correlation. Nonparametric independent-samples median tests were used to ascertain if the median questioning scores significantly differed across scenarios and between pharmacists and non-pharmacists. Point-biserial correlations were performed to determine if the proportion of interactions resulting in a key outcome differed over the course of the nine visits.

A binary logistic regression model was developed to identify variables that were predictors of a scenario resulting in an appropriate outcome. Independent variables included in this model were whether a pharmacist was involved in the interaction, the questioning score, the visit number (1-9), the legislative status of the product requested, if the mystery shopper was identified by the pharmacy staff, the pharmacy as a whole, if written information was provided, and each individual scenario. Allergic rhinitis was selected as the reference scenario for the purpose of the model as it had the lowest proportion of appropriate outcome and was therefore deemed the poorest performing scenario. All independent variables were tested for collinearity.

## RESULTS

Sixty-one undergraduate pharmacy students completed 540 mystery shopping visits at 36 different community pharmacies across the Sydney metropolitan region from March-October in 2015. Of these visits, 521 (96%) were eligible for analysis. Reasons for exclusion of the remaining 19 visits included; the shopper being identified as a mystery shopper resulting in termination of the interaction (n=8), incomplete or missing datasheets (n=6), consent refused by the staff member (n=3), error by the mystery shopper during the interaction (n=1), and no stock of the requested product (n=1). Four of the excluded visits were from the allergic rhinitis scenario, three each from the diarrhoea, paediatric fever, and smoking cessation scenarios, two each from the adult cough/cold and adult pain scenarios, and one each from the dyspepsia and insomnia scenarios. Students were identified as mystery shoppers in 6% of cases (n=30).

### outcome and questioning scores over time

An appropriate outcome was achieved in 54% (n=283) of analysed visits. The proportion of visits resulting in an appropriate outcome by scenario is reported in Table 1. Point-biserial correlations showed that the proportion of visits resulting in the key outcome increased over the course of the nine visits across all scenarios ( $r_{pb}=0.192$ ;  $p<0.001$ ). When examining scenarios individually, an improvement over time was seen in the adult cough/cold scenario ( $r_{pb}=0.281$ ;  $p=0.044$ ), the allergic rhinitis scenario ( $r_{pb}=0.334$ ;  $p<0.018$ ), the smoking cessation scenario ( $r_{pb}=0.390$ ;  $p=0.005$ ), and the paediatric fever scenario ( $r_{pb}=0.356$ ;  $p=0.01$ ) (Table 2). Table 2 also outlines the proportions of visits resulting in the key outcome by visit clusters (1-3, 4-6, 7-9) and overall.

**Table 1: Results of overall appropriateness over time by scenario**

| Scenario                            | Visits 1-3 | Visits 4-6 | Visits 7-9 | Overall | Improvement Over Time <sup>a</sup> |
|-------------------------------------|------------|------------|------------|---------|------------------------------------|
| <b>Adult Cough/Cold (n=52)</b>      | 17%        | 41%        | 53%        | 37%     | Yes                                |
| <b>Adult Pain (n=52)</b>            | 67%        | 53%        | 71%        | 64%     | No                                 |
| <b>Allergic Rhinitis (n=50)</b>     | 6%         | 18%        | 27%        | 16%     | Yes                                |
| <b>Asthma (n=54)</b>                | 50%        | 83%        | 78%        | 70%     | No                                 |
| <b>Diarrhoea (n=51)</b>             | 50%        | 65%        | 56%        | 57%     | No                                 |
| <b>Dyspepsia (n=53)</b>             | 78%        | 65%        | 67%        | 70%     | No                                 |
| <b>Insomnia (n=53)</b>              | 33%        | 77%        | 61%        | 57%     | No                                 |
| <b>Paediatric Cough/Cold (n=54)</b> | 72%        | 83%        | 78%        | 78%     | No                                 |
| <b>Paediatric Fever (n=51)</b>      | 47%        | 53%        | 94%        | 65%     | Yes                                |
| <b>Smoking Cessation (n=51)</b>     | 12%        | 19%        | 50%        | 28%     | Yes                                |
| <b>ALL (n=521)</b>                  | 43%        | 56%        | 64%        | 54%     | Yes                                |

a = significance determined by point-biserial analyses,  $p < 0.05$

Overall median questioning scores were 44% (Range=0-100%, IQR=22-75%). Nonparametric independent-samples median tests determined that scores differed significantly across scenarios ( $p < 0.001$ ). Using Spearman's rank order correlations, questioning scores were found to improve over time ( $r_s = 0.204$ ;  $p < 0.001$ ). When examining individual scenarios, questioning scores improved for the adult cough/cold scenario ( $r_s = 0.404$ ;  $p = 0.003$ ), the adult pain scenario ( $r_s = 0.362$ ;  $p = 0.008$ ), the asthma scenario ( $r_s = 0.387$ ;  $p = 0.004$ ), and the paediatric fever scenario ( $r_s = 0.430$ ;  $p = 0.002$ ).

#### **participating pharmacies and pharmacy staff**

Half of the participating pharmacies in this study belonged to a chain or banner group ( $n = 18$ ). The majority of the pharmacies were located on a shopping strip (72%) and the remainder were in a shopping mall or similar.

The staff member(s) who interacted with the mystery shopper were recorded in all but one of the eligible visits ( $n = 520/521$ ). A pharmacist was involved in 72% ( $n = 376$ ) of the analysed interactions.

1  
2  
3 The remaining 144 interactions were handled in isolation by a non-pharmacist staff member.

4  
5 Interactions without the involvement of a pharmacist resulted in the key outcome being achieved in  
6  
7 33% of cases, whereas interactions with a pharmacist resulted in the key outcome in 62% of cases.

8  
9 Pearson's chi-squared analyses found this to be a significant difference ( $\chi^2=35.04$ ;  $p<0.001$ ).

10  
11 Median questioning and total scores were also found to be significantly different between interactions  
12  
13 with a pharmacist and those without ( $p<0.001$ ). The median questioning score for interactions with a  
14  
15 pharmacist were 50% (Range=0-100%, IQR=31-75%) vs. 25% (Range=0-100%, IQR=11-54%) for  
16  
17 those without.  
18

### 19 20 **regression model**

21  
22 The binary logistic regression model is shown in Table 2. The model returned a Nagelkerke  $R^2$  value  
23  
24 of 0.60. Involvement of the pharmacist in the interaction, the visit number, the questioning score, and  
25  
26 the scenario type were all found to be significant positive predictors ( $p=0.008$ ,  $p=0.022$ ,  $p<0.001$ , and  
27  
28  $p<0.001$  respectively) of achievement of the key outcome i.e. providing an "appropriate" outcome for  
29  
30 the mystery shopper. The legislative status of the product requested, if the shopper was identified by  
31  
32 pharmacy staff, and the individual pharmacy were not found to be significant predictors. As the  
33  
34 pharmacy was not found to be significant this category was not broken down further.  
35  
36  
37  
38  
39  
40  
41  
42  
43  
44  
45  
46  
47  
48  
49  
50  
51  
52  
53  
54  
55  
56  
57  
58  
59  
60

**Table 2: Factors predicting appropriate outcome of mystery shopping scenarios – binary logistic regression model output (Nagelkerke R<sup>2</sup> = 0.60)**

| Variable                                               | $\beta$<br>Coefficient | OR     | 95% CI      |             | p-value             |
|--------------------------------------------------------|------------------------|--------|-------------|-------------|---------------------|
|                                                        |                        |        | Lower Bound | Upper Bound |                     |
| <b>Pharmacist involvement in interaction</b>           | 0.398                  | 1.489  | 1.111       | 1.996       | 0.008 <sup>c</sup>  |
| <b>Mystery shopping visit number (1-9)</b>             | 0.110                  | 1.113  | 1.016       | 1.226       | 0.022 <sup>b</sup>  |
| <b>Questioning score</b>                               | 0.062                  | 1.063  | 1.050       | 1.077       | <0.001 <sup>d</sup> |
| <b>Legislative status of product requested</b>         | 0.186                  | 1.204  | 0.483       | 3.000       | 0.691               |
| <b>Mystery shopper identified by pharmacy staff</b>    | 0.405                  | 1.500  | 0.875       | 2.572       | 0.140               |
| <b>Individual pharmacy<sup>a</sup></b>                 | -0.010                 | 0.990  | 0.968       | 1.014       | 0.418               |
| <b>Allergic rhinitis scenario (reference scenario)</b> |                        |        |             |             | <0.001 <sup>d</sup> |
| <b>Adult cough/cold scenario</b>                       | 0.211                  | 1.235  | 0.381       | 4.005       | 0.752               |
| <b>Adult pain scenario</b>                             | 1.754                  | 5.779  | 1.307       | 25.555      | 0.021 <sup>b</sup>  |
| <b>Asthma scenario</b>                                 | 2.868                  | 17.596 | 3.762       | 82.301      | <0.001 <sup>d</sup> |
| <b>Diarrhoea scenario</b>                              | 2.072                  | 7.943  | 2.071       | 30.459      | 0.003 <sup>c</sup>  |
| <b>Dyspepsia scenario</b>                              | 2.900                  | 18.182 | 4.462       | 74.093      | <0.001 <sup>d</sup> |
| <b>Insomnia scenario</b>                               | 1.274                  | 3.576  | 0.813       | 15.740      | 0.092               |
| <b>Paediatric cough/cold scenario</b>                  | 4.463                  | 86.770 | 24.328      | 309.478     | <0.001 <sup>d</sup> |
| <b>Paediatric fever scenario</b>                       | 3.623                  | 37.437 | 10.723      | 130.699     | <0.001 <sup>d</sup> |
| <b>Smoking cessation scenario</b>                      | 0.024                  | 1.024  | 0.113       | 9.251       | 0.983               |

a = pharmacy was not broken down further due to not returning a significant value

b = significant at 0.05 level; c = significant at 0.01 level; d = significant at 0.001 level

## DISCUSSION

This study is the first to use the mystery shopping with feedback methodology across a large number of minor ailment scenarios with multiple repeated visits. The results from the 521 eligible visits demonstrated that multiple visits with feedback were able to improve both the questioning scores of the pharmacy staff participants over time, as well as the proportion of visits achieving an appropriate outcome.

1  
2  
3 The success of this intervention may be explained, at least in part, by existing literature in the area of  
4 audit and feedback,[13-15] in particular Kluger and DeNisi's Feedback Intervention Theory  
5 (FIT).[31] This theory postulates that individuals compare their behaviour to the standard that is  
6 expected and when they identify that there is inconsistency between the two they alter their behaviour  
7 in order to achieve this benchmark.[14] The purpose of audit and feedback is to provide a means  
8 through which individuals can identify areas of their practice that do not meet expected standards,  
9 whilst also providing information on how to alter their focus and improve behaviour.[14] Several  
10 factors that have been identified through the FIT and meta-analyses of audit and feedback intervention  
11 studies[14] to be positive predictors of a successful audit and feedback intervention were used in this  
12 study. These include information about how to perform the task correctly, written feedback,  
13 monitoring change from a previous time period, and the provision of individual feedback.[14] Future  
14 feedback interventions may wish to include other design aspects that have also been positively  
15 associated with successful interventions such as individual and group feedback, the provision of  
16 graphic materials, and goal setting.[14]

17  
18  
19  
20  
21  
22  
23  
24  
25  
26  
27  
28  
29  
30  
31  
32 It is interesting to note that whilst there was an overall improvement over time when the data are  
33 pooled, it was not consistent between scenarios. Further investigation is warranted in targeting the  
34 scenarios that performed less favourably to determine why this may have occurred. It is possible that  
35 it may be either a result of the nature of the scenarios or the way they were designed by the research  
36 team. The scenarios were all designed as direct-product requests, rather than symptom-based requests.  
37 Direct-product requests have previously been shown to be negotiated more poorly by pharmacy  
38 staff.[32]

39  
40  
41  
42  
43  
44  
45  
46  
47 The result that a pharmacist being involved in the interaction was more likely to elicit both a higher  
48 questioning score and subsequently an appropriate outcome is consistent with other literature in this  
49 field.[11] Previous mystery shopping intervention studies have also identified a correlation between  
50 the number of questions asked and a successful outcome, both in the provision of salbutamol for  
51 asthma[21] and antifungal medications for vaginal thrush.[18] Despite increased questioning  
52 correlating to an appropriate outcome, research has suggested that not only is any questioning  
53  
54  
55  
56  
57  
58  
59  
60

1  
2  
3 important, but it is also important to consider the types of questions asked and if these questions lead  
4 the staff member to an appropriate outcome.[5, 33] It has been suggested that protocols, such as  
5 WWHAM in the United Kingdom,[34] may not be sufficient in isolation to take an accurate history,  
6 arrive at the correct diagnosis, and make an appropriate recommendation, and the use of questions  
7 targeted at the specific patient and scenario may be more likely to elicit a desirable outcome.[33-34] It  
8 is interesting to note that in an Australian context, the WHAT-STOP-GO protocol is primarily  
9 targeted at non-pharmacist staff. Considering the lack of clinical background and speciality in  
10 medicines, the role of these protocols in training both pharmacists and other staff should be evaluated.  
11 A recent study has suggested that encouraging patients to ask the pharmacist more questions about  
12 their medicine may result in the provision of more information and a longer consultation.[35] The  
13 feasibility of facilitating patient engagement with their pharmacist when requesting non-prescription  
14 medicines should be explored further.

15  
16  
17  
18  
19  
20  
21  
22  
23  
24  
25  
26  
27  
28 It is worthy to note the difference in results between each of the scenarios. In order to assess the  
29 efficacy of this intervention, scenarios were designed to be of a range of difficulties. In a separate  
30 study, using three of 10 scenarios in this dataset, the scenarios were designed explicitly to elicit  
31 mystery shopper referral to a medical practitioner (asthma, diarrhoea, and dyspepsia) and were not  
32 found to improve over time.[36] This may be due to these scenarios being more difficult and the role  
33 of referral not being engrained in day-to-day practice. The scenarios that performed most poorly in  
34 this study, allergic rhinitis and smoking cessation, may also be due to the difficult nature of the  
35 scenario design. In the smoking cessation scenario staff were required to identify an interaction  
36 between recent cessation of smoking and the decreased cytochrome P450-mediated metabolism of  
37 caffeine,[37] whereas in the allergic rhinitis scenario, staff were presented with a request for an  
38 antihistamine and expected to “step up” the patient to an intra-nasal corticosteroid as recommended  
39 by current guidelines.[38] Despite the initial low scores of these scenarios, improvement was seen  
40 over time with repeated mystery shopping visits and feedback. It is important to note that this study  
41 did not examine if the staff made *inappropriate* recommendations, but whether or not the staff  
42 achieved the “gold standard” outcome as determined by the pharmacist research team when writing  
43  
44  
45  
46  
47  
48  
49  
50  
51  
52  
53  
54  
55  
56  
57  
58  
59  
60



1  
2  
3 the scenarios. Due to variability in scenario performance, particularly in these more difficult  
4 scenarios, future interventions may want to focus on specific topic areas. Further work is also needed  
5 to determine why pharmacy staff are performing differently in these situations.  
6  
7

8  
9  
10 The strengths of this study lie in the large number of visits included in the analysis and the variety of  
11 scenarios used. However, this study is limited by several factors. The nature of the mystery shopper  
12 methodology means that it is never truly possible to determine what happens with real patients and  
13 how interactions with pharmacy staff may shape their health outcomes in the future. Instead, surrogate  
14 markers such as an appropriate outcome must be relied upon. Despite the large number of visits, these  
15 were restricted to the metropolitan region of Sydney and may not be generalisable to the rest of  
16 Australia or the world. Although staff identification of the mystery shopper was not frequently  
17 reported, it is possible that this was under-reported and this may have impacted how the staff handled  
18 the mystery shoppers' requests. Likewise, the staff were aware that the study was taking place, and  
19 the pharmacy was also able to keep the cost of any sales made to the mystery shoppers which again  
20 may have influenced practice. The datasheet used in this study has not been validated for use in this  
21 setting, and despite a proportion of recordings being audited against the recorded scores, it cannot be  
22 guaranteed that the written recording of data by student mystery shoppers was completely accurate in  
23 all cases. The voluntary nature of participation for the pharmacies may also have resulted in the  
24 pharmacies that are already more likely to perform better. Limitations in the ability to identify  
25 whether a single staff member was involved in a mystery shopping interaction on multiple occasions,  
26 and exactly who served the mystery shopper at first must also be considered when interpreting the  
27 results of this study.  
28  
29  
30  
31  
32  
33  
34  
35  
36  
37  
38  
39  
40  
41  
42  
43  
44  
45  
46  
47  
48

## 49 **CONCLUSION**

50  
51  
52 Mystery shopping with feedback across multiple visits improved pharmacy staff performance over  
53 time. Multiple visits, pharmacist involvement, increased questioning, and the prescribed scenario were  
54 predictors of a visit resulting in an appropriate outcome. Mystery shopping with feedback should be  
55  
56  
57  
58  
59  
60

1  
2  
3 explored as a means to train pharmacy staff in an appropriate provision of non-prescription medicines  
4  
5 to ensure optimal patient outcomes. Success in the field of pharmacy may warrant exploring the use of  
6  
7 this methodology in other healthcare settings. Future interventions should focus on the contribution of  
8  
9 non-pharmacist staff to patient care and design interventions to better target this population.  
10

## 11 12 13 14 **ACKNOWLEDGEMENTS**

15  
16  
17 The authors wish to acknowledge all of the Bachelor of Pharmacy students, and pharmacy staff who  
18  
19 participated in this study.  
20

## 21 22 **AUTHOR CONTRIBUTIONS**

23  
24 CRS, ACDN and RJM conceived the study design. CRS, FW and RJM coordinated the study. JCC,  
25  
26 CRS, FW, ACDN and RJM trained students. FW designed scenarios. JCC and CLN completed data  
27  
28 collection and data entry. JCC, CRS and RJM conducted data analysis and interpretation of results.  
29  
30 JCC drafted the manuscript. All authors contributed to critical revision of the manuscript and  
31  
32 approved the final manuscript for submission.  
33  
34

## 35 36 **COMPETING INTERESTS**

37  
38 The authors have no competing interests to declare.  
39

## 40 41 **FUNDING**

42  
43 This work was supported by the Australian Government Office for Learning and Teaching [grant  
44  
45 number SD14-4207]; the Pharmacy Council of NSW [grant number G176927]; and Alphapharm Pty  
46  
47 Ltd [grant number G176862]. The sponsors had no role in the conception and development of the  
48  
49 study; collection, analysis or interpretation of data; writing of this report; or the decision to submit this  
50  
51 report for publication.  
52  
53  
54  
55  
56  
57  
58  
59  
60

## DATA SHARING STATEMENT

Raw dataset available online from LabArchives via the following DOI:

<http://dx.doi.org/10.6070/H4BK19ST>

## REFERENCE LIST

- 1 Grime J, Blenkinsopp A, Raynor DK, et al. The role and value of written information for patients about individual medicines: a systematic review. *Health Expect* 2007;10(3):286-98.
- 2 Watts A, Castleman L, Phillips BB. Impact of a community pharmacist on patient knowledge of NPMs. *J Pharm Technol* 2010;26(3):111-5.
- 3 Hong SH, Spadaro D, West D, et al. Patient valuation of pharmacist services for self care with OTC medications. *J Clin Pharm Ther* 2005;30(3):193-9.
- 4 Gauld NJ, Kelly FS, Kurosawa N, et al. Widening consumer access to medicines through switching medicines to non-prescription: a six country comparison. *PLOS ONE* 2014;9(9):e107726.
- 5 Rutter PM, Horsley E, Brown DT. Evaluation of community pharmacists' recommendations to standardized patient scenarios. *Ann Pharmacother* 2004;38(6):1080-5.
- 6 Rutter P. Role of community pharmacists in patients' self-care and self-medication. *Integr Pharm Res Pract* 2015;4:57-65.
- 7 Bradley CP, Bond C. Increasing the number of drugs available over the counter: arguments for and against. *Br J Gen Pract* 1995;45:4.
- 8 Hughes CM, McElroy JC, Fleming GF. Benefits and risks of self medication. *Drug Saf* 2001;24(14):1027-37.
- 9 Ngwerume K, Watson M, Bond C, et al. An evaluation of an intervention designed to improve the evidence-based supply of non-prescription medicines from community pharmacies. *Int J Pharm Pract* 2014;23(2):102-10.

1  
2  
3 10 Coelho RB, da Costa FA. Impact of pharmaceutical counseling in minor health problems in rural  
4 Portugal. *Pharm Pract* 2014;12(4):451.

5  
6  
7 11 Watkins K, Wood H, Schneider CR, et al. Effectiveness of implementation strategies for clinical  
8 guidelines to community pharmacy: a systematic review. *Implement Sci* 2015;10(1).

9  
10  
11 12 Foy R, Eccles M, Jamtvedt G, et al. What do we know about how to do audit and feedback?  
12 Pitfalls in applying evidence from a systematic review. *BMC Health Serv Res* 2005;5(1):50.

13  
14  
15 13 Ivers N, Jamtvedt G, Flottorp S, et al. Audit and feedback: effects on professional practice and  
16 healthcare outcomes. *Cochrane Database Syst Rev* doi: 10.1002/14651858.CD000259.pub3.

17  
18  
19 14 Hysong SJ, Kell HJ, Petersen LA, et al. Theory-based and evidence-based design of audit and  
20 feedback programmes: examples from two clinical intervention studies. *BMJ Qual Saf*  
21 2017;26(4):323-34.

22  
23  
24 15 Hysong SJ. Meta-Analysis: Audit & feedback features impact effectiveness on care quality. *Med*  
25 *Care* 2009;47(3):356-63.

26  
27  
28 16 Xu T, de Almeida Neto AC, Moles RJ. A systematic review of simulated-patient methods used in  
29 community pharmacy to assess the provision of non-prescription medicines. *Int J Pharm Pract*  
30 2012;20(5):307-19.

31  
32  
33 17 de Almeida Neto AC, Kelly F, Benrimoj SI. Shaping practice behaviour: novel training  
34 methodology. *Int J Pharm Pract* 2001;9(3):203-10.

35  
36  
37 18 Watson MC. Factors predicting the guideline compliant supply (or non-supply) of non-  
38 prescription medicines in the community pharmacy setting. *Qual Saf Health Care* 2006;15(1):53-7.

39  
40  
41 19 Watson MC, Cleland JA, Bond CM. Simulated patient visits with immediate feedback to improve  
42 the supply of over-the-counter medicines: a feasibility study. *Fam Pract* 2009;26(6):532-42.

43  
44  
45 20 Berger K, Eickhoff C, Schulz M. Counselling quality in community pharmacies: implementation of  
46 the pseudo customer methodology in Germany. *J Clin Pharm Ther* 2005;30(1):45-57.

1  
2  
3 21 Schneider CR, Everett AW, Geelhoed E, et al. Intern pharmacists as change agents to improve the  
4  
5 practice of nonprescription medication supply: provision of salbutamol to patients with asthma. *Ann*  
6  
7 *Pharmacother* 2010;44(7-8):1319-26.

8  
9 22 Horvat N, Koder M, Kos M. Using the simulated patient methodology to assess paracetamol-  
10  
11 related counselling for headache. *PLOS ONE* 2012;7(12):e52510.

12  
13 23 Xu T, de Almeida Neto AC, Moles RJ. Simulated caregivers: their feasibility in educating pharmacy  
14  
15 staff to manage children's ailments. *Int J Clin Pharm*. 2012;34(4):587-95.

16  
17 24 Benrimoj SI, Werner JB, Raffaele C, et al. A system for monitoring quality standards in the  
18  
19 provision of non-prescription medicines from Australian community pharmacies. *Pharm World Sci*  
20  
21 2007;30(2):147-53.

22  
23 25 Benrimoj SI, Werner JB, Raffaele C, et al. Monitoring quality standards in the provision of non-  
24  
25 prescription medicines from Australian community pharmacies: results of a national programme.  
26  
27 *Qual Saf Health Care* 2007;16(5):354-8.

28  
29 26 Therapeutic Goods Administration. The Poisons Standard No. 16 Canberra: Australian  
30  
31 Government; 2017. Available from: <https://www.legislation.gov.au/Details/F2017L00057>. Accessed  
32  
33 July 2017.

34  
35 27 Collins JC, Schneider CR, Wilson F, et al. Community pharmacy modifications to non-prescription  
36  
37 medication requests: a simulated patient study. *Res Soc Adm Pharm* Published Online First: 22 May  
38  
39 2017. doi: 10.1016/j.sapharm.2017.05.007.

40  
41 28 Pharmaceutical Society of Australia. Standards for the provision of pharmacy medicines and  
42  
43 pharmacist only medicines in community pharmacy Canberra: Pharmaceutical Society of Australia;  
44  
45 2006. Available from: <http://www.psa.org.au/download/standards/s2s3-standards.pdf>. Accessed  
46  
47 July 2017.

48  
49 29 Sporer KA. The Serotonin Syndrome. *Drug Saf* 1995;13(2):94-104.

50  
51 30 Werner JB, Benrimoj SI. Audio taping simulated patient encounters in community pharmacy to  
52  
53 enhance the reliability of assessments. *Am J Pharm Educ* 2008;72(6):136.

- 1  
2  
3 31 Kluger AN, DeNisi A. The effects of feedback Interventions on performance: a historical review, a  
4 meta-analysis, and a preliminary feedback intervention theory. *Psychol Bull* 1996;119(2):254-84.  
5  
6  
7 32 Kelly FS, Williams KA, Benrimoj SI. Does advice from pharmacy staff vary according to the  
8 nonprescription medicine requested? *Ann Pharmacother* 2009;43(11):1877-86.  
9  
10  
11 33 Akhtar S, Rutter P. Pharmacists thought processes in making a differential diagnosis using a  
12 gastro-intestinal case vignette. *Res Soc Adm Pharm* 2015;11(3):472-9.  
13  
14  
15 34 Rutter PM, Patel J. Decision making by community pharmacists when making an over-the-counter  
16 diagnosis in response to a dermatological presentation. *SelfCare* 2013;4(6):125-33.  
17  
18  
19 35 Peters J, Desai K, Ricci D, et al. The power of the patient question: A secret shopper study. *Patient*  
20  
21  
22 *Educ Couns* 2016;99(9):1526-33.  
23  
24  
25 36 Collins JC, Schneider CR, Faraj R, et al. Management of common ailments requiring referral in the  
26 pharmacy: a mystery shopping intervention study. *Int J Clin Pharm* 2017;39(4):697-703.  
27  
28  
29 37 Bittoun R. The influence of caffeine on smoking cessation: a case presentation. *Journal of Smok*  
30  
31 *Cess* 2010;5(2):iii.  
32  
33 38 Brožek JL, Bousquet J, Baena-Cagnani CE, et al. Allergic Rhinitis and its impact on asthma (ARIA)  
34 guidelines: 2010 revision. *J Allergy Clin Immunol* 2010;126(3):466-76.  
35  
36  
37  
38  
39  
40  
41  
42  
43  
44  
45  
46  
47  
48  
49  
50  
51  
52  
53  
54  
55  
56  
57  
58  
59  
60

## WALKING IN CONSUMERS SHOES: SEM 2 DATA COLLECTION FORM

| SCENARIO TEN                                | VERSION EIGHT                                                                                                                                                                                                                                                                                               |
|---------------------------------------------|-------------------------------------------------------------------------------------------------------------------------------------------------------------------------------------------------------------------------------------------------------------------------------------------------------------|
| Product requested                           | VENTOLIN® [Salbutamol]                                                                                                                                                                                                                                                                                      |
| Who is the patient?                         | Self                                                                                                                                                                                                                                                                                                        |
| How long:                                   | Had asthma since you were a child                                                                                                                                                                                                                                                                           |
| Actual Symptoms – what are they?            | Wheezy during the day                                                                                                                                                                                                                                                                                       |
| Treatment for this or any other conditions? | Take puffer (Ventolin®) three or four times a day when you feel wheezy. Helps for a little while.<br><br>If asked you are not coughing at night.                                                                                                                                                            |
| Additional Info                             | Think you only have mild asthma that is under control. Do not realise that you are overusing your puffer. Do have a Seretide® [fluticasone propionate/salmeterol] inhaler somewhere, not using it at the moment.<br><br>No asthma management plan. Haven't discussed asthma with a doctor for a year or so. |
| Have you used it before?                    | Yes.                                                                                                                                                                                                                                                                                                        |
| SCENARIO ANGLE                              | Refer to medical practitioner - poorly controlled asthma, no preventer use, and no asthma management plan.                                                                                                                                                                                                  |

|                      |  |
|----------------------|--|
| PHARMACY NAME AND ID |  |
| STUDENT NAME AND ID  |  |
| VISIT DATE           |  |
| VISIT TIME           |  |

| WHO SERVED YOU?                                         |   |   |
|---------------------------------------------------------|---|---|
| Pharmacy assistant?                                     | Y | N |
| Pharmacist?                                             | Y | N |
| Did the assistant ask the pharmacist for advice?        | Y | N |
| Did the assistant refer the customer to the pharmacist? | Y | N |
| Notes:                                                  |   |   |

## STUDENT FEEDBACK FORM (SCENARIO TEN)

| WHAT: DID THEY FIND OUT?                                                       |      |          |              |     |
|--------------------------------------------------------------------------------|------|----------|--------------|-----|
| W: Who the medicine was for?                                                   |      |          |              |     |
| Self                                                                           | Y    | N        | Part         | N/A |
| H: How long you'd had the symptoms?                                            |      |          |              |     |
| Years – diagnosed with asthma as a child                                       | Y    | N        | Part         | N/A |
| A: About the actual symptoms?                                                  |      |          |              |     |
| Wheezy during day                                                              | Y    | N        | Part         | N/A |
| T: About treatment for this or any other condition?                            |      |          |              |     |
| What treatment you'd already tried? (Regular salbutamol use)                   | Y    | N        | Part         | N/A |
| Was the treatment successful? (Moderately)                                     | Y    | N        | Part         | N/A |
| If you take any other medication? (Have Seretide® – don't use it)              | Y    | N        | Part         | N/A |
| If you have any other medical conditions? (None)                               | Y    | N        | Part         | N/A |
| STOP: DID THEY STOP AND?                                                       |      |          |              |     |
| Consider the issue? (Poorly controlled asthma/no asthma management plan)       | Y    | N        | Part         | N/A |
| GO: DID THEY?                                                                  |      |          |              |     |
| Address the issue?                                                             |      |          |              |     |
| Refer to GP for review                                                         | Y    | N        | Part         | N/A |
| Suggest a review of asthma management plan                                     | Y    | N        | Part         | N/A |
| Other? (please record here)                                                    |      |          |              |     |
| Recommend/provide any <b>products</b> ?                                        | Y    | N        | Part         | N/A |
| Record Product Name/s and Strength:                                            |      |          |              |     |
| For each product they recommended/provided, did they:                          |      |          |              |     |
| Recommend an appropriate dose and dosage interval?                             | Y    | N        | Part         | N/A |
| Recommend how long to use the product for?                                     | Y    | N        | Part         | N/A |
| Provide relevant <b>verbal advice</b> on asthma management?                    | Y    | N        | Part         | N/A |
| Record type of Verbal Advice                                                   |      |          |              |     |
| Provide relevant <b>written advice</b> ? (please attach to this form)          | Y    | N        | Part         | N/A |
| Provide appropriate <b>follow-on advice</b> ?                                  |      |          |              |     |
| Refer you to the doctor for the presenting symptoms?                           | Y    | N        | Part         | N/A |
| Tell the customer when to return to the pharmacy?                              | Y    | N        | Part         | N/A |
| Tell the customer when to visit the doctor (e.g. if it persists)?              | Y    | N        | Part         | N/A |
| Record any specific Follow-on advice (i.e. advice on WHAT to do next and WHEN) |      |          |              |     |
| OVERALL                                                                        |      |          |              |     |
| Do you think the visit had an <b>appropriate outcome</b> ?                     | Y    | N        | Part         | N/A |
| Do you think they established a <b>good rapport</b> with you?                  | Y    | N        | Part         | N/A |
| How would you rate the information they provided?                              | Good | Adequate | Not Adequate |     |
| Do you have any comments?                                                      |      |          |              |     |



## COUNSELLOR FEEDBACK FORM (SCENARIO TEN)

| WHAT: DID YOU FIND OUT?                                                        |      |          |              |     |
|--------------------------------------------------------------------------------|------|----------|--------------|-----|
| W: Who the medicine was for?                                                   |      |          |              |     |
| Self                                                                           | Y    | N        | Part         | N/A |
| H: How long they'd had the symptoms?                                           |      |          |              |     |
| Years – diagnosed with asthma as a child                                       | Y    | N        | Part         | N/A |
| A: About the actual symptoms?                                                  |      |          |              |     |
| Wheezy during day                                                              | Y    | N        | Part         | N/A |
| T: About treatment for this or any other condition?                            |      |          |              |     |
| What treatment they'd already tried? (Regular salbutamol use)                  | Y    | N        | Part         | N/A |
| Was the treatment successful? (Moderately)                                     | Y    | N        | Part         | N/A |
| If they take any other medication? (Have Seretide® – don't use it)             | Y    | N        | Part         | N/A |
| If they have any other medical conditions? (None)                              | Y    | N        | Part         | N/A |
| STOP: DID YOU STOP AND?                                                        |      |          |              |     |
| Consider the issue? (Poorly controlled asthma/no asthma management plan)       | Y    | N        | Part         | N/A |
| GO: DID YOU?                                                                   |      |          |              |     |
| Address the issue?                                                             |      |          |              |     |
| Refer to GP for review                                                         | Y    | N        | Part         | N/A |
| Suggest a review of asthma management plan                                     | Y    | N        | Part         | N/A |
| Other? (please record here)                                                    |      |          |              |     |
| Recommend/provide any <b>products</b> ?                                        | Y    | N        | Part         | N/A |
| Record Product Name/s and Strength:                                            |      |          |              |     |
| For each product you provided, did you:                                        |      |          |              |     |
| Recommend an appropriate dose and dosage interval?                             | Y    | N        | Part         | N/A |
| Recommend how long to use the product for?                                     | Y    | N        | Part         | N/A |
| Provide relevant <b>verbal advice</b> on asthma management?                    | Y    | N        | Part         | N/A |
| Record type of Verbal Advice                                                   |      |          |              |     |
| Provide relevant <b>written advice</b> ? (please attach to this form)          | Y    | N        | Part         | N/A |
| Provide appropriate <b>follow-on advice</b> ?                                  |      |          |              |     |
| Refer the customer to the doctor for the presenting symptoms?                  | Y    | N        | Part         | N/A |
| Tell the customer when to return to you?                                       | Y    | N        | Part         | N/A |
| Tell the customer when to visit the doctor (e.g. if it persists)?              | Y    | N        | Part         | N/A |
| Record any specific Follow-on advice (i.e. advice on WHAT to do next and WHEN) |      |          |              |     |
| OVERALL                                                                        |      |          |              |     |
| Do you think the visit had an <b>appropriate outcome</b> ?                     | Y    | N        | Part         | N/A |
| Do you think you established a <b>good rapport</b> with the customer?          | Y    | N        | Part         | N/A |
| How would you rate the information you provided?                               | Good | Adequate | Not Adequate |     |
| Do you have any comments?                                                      |      |          |              |     |

# BMJ Open

## Mystery shopping and coaching as a form of audit and feedback to improve community pharmacy management of non-prescription medicine requests: an intervention study

|                                 |                                                                                                                                                                                                                                                                                                                                                                                                               |
|---------------------------------|---------------------------------------------------------------------------------------------------------------------------------------------------------------------------------------------------------------------------------------------------------------------------------------------------------------------------------------------------------------------------------------------------------------|
| Journal:                        | <i>BMJ Open</i>                                                                                                                                                                                                                                                                                                                                                                                               |
| Manuscript ID                   | bmjopen-2017-019462.R1                                                                                                                                                                                                                                                                                                                                                                                        |
| Article Type:                   | Research                                                                                                                                                                                                                                                                                                                                                                                                      |
| Date Submitted by the Author:   | 24-Oct-2017                                                                                                                                                                                                                                                                                                                                                                                                   |
| Complete List of Authors:       | Collins, Jack; The University of Sydney, Faculty of Pharmacy<br>Schneider, Carl; The University of Sydney, Faculty of Pharmacy<br>Naughtin, Clare; The University of Sydney, Faculty of Pharmacy<br>Wilson, Frances; The University of Sydney, Faculty of Pharmacy<br>de Almeida Neto, Abilio; The University of Sydney, Faculty of Pharmacy<br>Moles, Rebekah; The University of Sydney, Faculty of Pharmacy |
| <b>Primary Subject Heading</b>: | Medical education and training                                                                                                                                                                                                                                                                                                                                                                                |
| Secondary Subject Heading:      | Evidence based practice, Health services research                                                                                                                                                                                                                                                                                                                                                             |
| Keywords:                       | pharmacy, simulated patient, community pharmacy, minor ailment, nonprescription medicine, standardized patient                                                                                                                                                                                                                                                                                                |
|                                 |                                                                                                                                                                                                                                                                                                                                                                                                               |

SCHOLARONE™  
Manuscripts

1  
2  
3 Mystery shopping and coaching as a form of audit and feedback to improve  
4  
5  
6 community pharmacy management of non-prescription medicine requests: an  
7  
8 intervention study  
9  
10

11 Jack Charles Collins<sup>1,\*</sup>, Carl Richard Schneider<sup>1</sup>, Clare Louise Naughtin<sup>1</sup>, Frances Wilson<sup>1</sup>, Abilio  
12 Cesar de Almeida Neto<sup>1</sup>, Rebekah Jane Moles<sup>1</sup>  
13  
14

15  
16 <sup>1</sup> Faculty of Pharmacy, The University of Sydney, Sydney, Australia.  
17  
18

19 **Corresponding Author**

20  
21 \*Jack Charles Collins  
22  
23

24 E: jack.c.collins@sydney.edu.au  
25  
26

27 T: +61 2 9036 7187  
28  
29

30 Postal Address:  
31

32 Faculty of Pharmacy  
33

34 Pharmacy and Bank Building A15, Science Rd  
35  
36

37 The University of Sydney  
38  
39

40 NSW 2006  
41  
42

43 Australia  
44  
45  
46  
47

48 **Word count:** 3589  
49  
50  
51  
52  
53  
54  
55  
56  
57  
58  
59  
60

**ABSTRACT**

**Objectives:** To determine if repeated mystery shopping visits with feedback improve pharmacy performance over nine visits, and to determine what factors predict an appropriate outcome. **Design:** Prospective, parallel, repeated intervention, repeated measures mystery shopping (pseudo-patient) design. **Setting:** Thirty-six community pharmacies in metropolitan Sydney, Australia in March-October 2015. **Participants:** Sixty-one University of Sydney pharmacy undergraduates acted as mystery shoppers. Students enrolled in their third year of Bachelor of Pharmacy in 2015 were eligible to participate. Any community pharmacy in the Sydney metropolitan region was eligible to take part and were selected through convenience sampling. **Intervention:** Repeated mystery shopping with immediate feedback and coaching. **Outcome measures:** Outcome for each given scenario (appropriate or not) and questioning scores for each interaction. **Results:** Five hundred and twenty-one visits were analysed, of which 54% resulted in an appropriate outcome. Questioning scores and the proportion of interactions resulting in an appropriate outcome significantly improved over time ( $p<0.001$ ). Involvement of pharmacists, visit number, increased questioning score, and the prescribed scenario were predictors of an appropriate outcome ( $p=0.008$ ,  $p=0.022$ ,  $p<0.001$ , and  $p<0.001$  respectively). Interactions involving a pharmacist had greater scores than those without ( $p<0.001$ ).

**Conclusions:** Repeated mystery shopping visits with feedback were associated with improved pharmacy performance over time. Future work should focus on the role of non-pharmacist staff and design interventions accordingly.

**Keywords:** pharmacy; standardized patient; simulated patient; community pharmacy; minor ailment; nonprescription medicine

## ARTICLE SUMMARY

### strengths and limitations of this study

- Large number of repeated mystery shopping visits (n=521)
- Examined 10 different minor ailment scenarios
- Thirty-six community pharmacies were mystery shopped
- Pharmacies were restricted to metropolitan Sydney, Australia
- Staff provided consent before mystery shopping visits occurred which may have influenced their handling of requests

## INTRODUCTION

It has been suggested that medicines are the most common form of medical intervention in the developed world.[1] In recent times, access to increasing numbers of medicines without a prescription is occurring due to the down-scheduling of a number of medicines from prescription-only to non-prescription (over-the-counter) status.[2-3] These regulatory changes can provide cost savings to insurers and governments,[4-5] facilitate patient self-care and self-medication,[6] and open up greater opportunities for treatment, however, down-scheduling can also create potential for medication misadventure.[7-8]

Pharmacies are important locations for those seeking non-prescription medicines and are equipped to manage a wide variety of ailments.[9-10] As pharmacies can play a major role through the provision of medicines and advice giving, it is important that pharmacy staff are adherent to guidelines and provide their patients with evidence-based treatment and advice to ensure optimal health outcomes.

In Australia, the pharmacy workforce consists of pharmacists (either registered or graduate “intern” pharmacists) who have completed a bachelor’s or master’s qualification at university, and non-pharmacists (assistants, technicians) whose level of training is not regulated and may vary. As both

1  
2  
3 pharmacists and non-pharmacists are permitted to engage in the sale of medicines and counselling  
4 patients on their use, it is important that both parties are appropriately trained to carry out their duties  
5 with respect to requests for non-prescription medicines.  
6  
7

8  
9  
10 Several intervention methods have been employed in the healthcare sector to improve practitioner  
11 performance and adherence to guidelines.[11-12] Audit and feedback has been identified as a  
12 commonly used and effective intervention method to change practitioner behaviour and improve the  
13 quality of care provided.[13-15] In the context of pharmacy practice, a form of this method of  
14 intervention that has been employed is that of mystery shopping with feedback.[16-17] This method  
15 of intervention has been used in many minor ailment scenarios (vaginal thrush,[18] dyspepsia,[19-20],  
16 asthma,[21] and headache[22]) and has been shown to be a feasible and acceptable method of  
17 intervention for staff involved.[19, 23] Further to improving practice, this methodology has also been  
18 employed to monitor and audit practice in the pharmacy setting.[24-25]  
19  
20  
21  
22  
23  
24  
25  
26  
27

28 This method of intervention involves a mystery shopper (also known as a simulated patient, pseudo  
29 patient, or secret shopper) entering a pharmacy and undertaking an interaction with a staff member.  
30 The mystery shopper should be indistinguishable from a regular patient, generally has a set scenario  
31 to follow, and may, but not always, be a professional actor.[16]  
32  
33  
34  
35  
36

37 In this study repeated mystery shopping visits with feedback was employed as a coaching technique to  
38 improve supply of non-prescription medicines for minor ailments in the community pharmacy setting.  
39 Therefore, the aim of this study was to use the method of mystery shopping with feedback to  
40 determine if scores and proportions of individuals achieving an appropriate outcome for each scenario  
41 changed over time and to determine what factors predict an appropriate outcome being achieved.  
42  
43  
44  
45  
46  
47  
48  
49  
50  
51  
52  
53  
54  
55  
56  
57  
58  
59  
60

## **METHODS**

A prospective parallel, repeated intervention, repeated measures study design was employed to assess the impact of mystery shopping with feedback on community pharmacy practice in Sydney, Australia between March and October, 2015.

### **ethics**

Ethics for this study was submitted to and approved by the Human Research Ethics Committee at the University of Sydney (reference number 2014/186).

### **participants and setting**

Bachelor of Pharmacy (BPharm) students entering their third year of the degree program at the University of Sydney in 2015 were invited to take part in the study to be mystery shoppers in lieu of a portion of their regular clinical placements program. Fifty-nine third-year students consented to take part in the study, with 30 taking part in semester one of the academic year (March-June) and the remaining 29 taking part in semester two (July-November). Two fourth-year honours students shared the role of the remaining place in the second semester to give a total of 61 students participating as mystery shoppers. Thirty-six of 59 third-year students successfully recruited one community pharmacy (n=36) in the Sydney metropolitan region (no other criteria for participating pharmacies were applied other than geographic location). Thirty of these pharmacies were selected to take part in semester one, with the remaining six reserved for semester two. The first 24 pharmacies from semester one to reply to an invitation to take part again in semester two were re-recruited, giving a total of 36 pharmacies taking part across both semesters.

### **consent process and training**

1  
2  
3 Authorised representatives from each pharmacy, such as the pharmacy owner or manager, were asked  
4 to provide consent for the pharmacy to be used as a location for the study. Each individual staff  
5 member at the pharmacy was also invited to provide informed consent, including consent to audio-  
6 recording, prior to the study commencing. Thus, the study was not truly covert. Pharmacy staff were  
7 informed of the timeline of the study and that they would receive one visit each week from a student  
8 mystery shopper, but were not informed of the identity of the shopper, which scenario they were  
9 allocated or exactly when the visits would occur.  
10  
11

12  
13  
14  
15  
16  
17  
18 Recruited students provided informed consent to act as mystery shoppers and for audio-recording of  
19 each visit and feedback session to occur. Students were trained across a two-day program where they  
20 learned how to enact all 10 scenarios (of which they went on to shop nine) through role-play with the  
21 research team, familiarised themselves with data collection sheets, were taught about theory behind  
22 the intervention, and trained in providing feedback to pharmacy staff.  
23  
24  
25  
26  
27  
28  
29  
30

### 31 **mystery shopping visits and data collection**

32  
33  
34 After completing training, students presented once a week to a pre-allocated pharmacy for nine weeks  
35 with a scripted direct-product request for a non-prescription medicine e.g. “Can I get some Zantac®  
36 [ranitidine], please?” Each week individual students visited a different pharmacy in order to minimise  
37 the risk of detection. Each pharmacy was allocated a different scenario (one of 10) relating to a minor  
38 ailment. In each semester, three pharmacies were allocated each scenario (10 scenarios × 6  
39 pharmacies × 9 visits = 540 visits in total). Pharmacies that participated in both semesters were  
40 allocated a different scenario in the second semester to the one that was allocated in the first, meaning  
41 each pharmacy was allocated a maximum of two of 10 scenarios across the course of the study.  
42  
43  
44  
45  
46  
47  
48  
49

50 Scenarios included adult cough/cold, adult pain, allergic rhinitis, asthma, diarrhoea, dyspepsia,  
51 insomnia, paediatric cough/cold, paediatric fever, and smoking cessation. Scenarios variables were  
52 altered each visit by the researchers in the script given to students, including who the medicine was  
53 for, what symptoms they were experiencing, the product requested, if the person was on any other  
54  
55  
56  
57  
58  
59  
60



1  
2  
3 therapy, and the legislative status of the product requested. In Australia, medicines available without a  
4 prescription are classified into three “schedules”. These are *Pharmacist Only* (a registered pharmacist  
5 (or graduate pharmacist) must *personally* hand the product to the individual requesting it), *Pharmacy*  
6 *Medicine* (can only be sold under the supervision of a registered pharmacist in a licensed premises), or  
7 unscheduled (general sale permitted in outlets such as supermarkets).[26] Exemplar particulars for  
8 each scenario have been previously published.[27]

9  
10  
11  
12  
13  
14  
15  
16 Mystery shoppers requested the product from the first staff member they encountered and followed  
17 questioning, counselling and purchasing as directed by the staff member. After purchasing any  
18 products (where a product was sold), students exited the pharmacy and completed a scoresheet based  
19 on the audio recording of the interaction. Within five minutes students returned to the pharmacy,  
20 provided the staff member with a blank copy of the scoresheet for them to complete as a form of self-  
21 evaluation and then provided verbal feedback to the staff member based on their performance. Any  
22 products purchased were returned to the pharmacy without refund and self-evaluation forms were  
23 collected from the staff member.

24  
25  
26  
27  
28  
29  
30  
31  
32  
33 Data collection sheets used in this study (online supplementary file 1) were based on the WHAT-  
34 STOP-GO protocol[28] developed by the Pharmaceutical Society of Australia to aid pharmacy staff  
35 (particularly non-pharmacist staff) in questioning individuals presenting with a request for non-  
36 prescription medicines. This aide-mémoire includes the questions **Who** the medicine is for, **How long**  
37 they have had the symptoms, what the **Actual** symptoms are, and if they are on any other **Treatments**  
38 for this presentation or another condition. The scores for each of these key questions were aggregated  
39 and classified as the “questioning” score. For each criterion, a score of yes (2 points), no (0 points),  
40 partial (1 point) or not applicable was applied. Scores were then totalled and converted to a percentage  
41 to account for any “not applicable” criteria. A maximum questioning score of 18 points was possible  
42 depending on the scenario specifics. For example, in the version of the asthma scenario included in  
43 the supplementary file, if a staff member asked all seven questions correctly (“yes”) they would be  
44 allocated a questioning score of 14 points, the maximum possible for that scenario. Other data were  
45 also recorded on the collection sheets such as the provision of a product and any counselling on its  
46  
47  
48  
49  
50  
51  
52  
53  
54  
55  
56  
57  
58  
59  
60

use, referral to a medical practitioner, perceived rapport, and the provision of written or verbal information the time and date of the visit, who served the shopper, and space for any comments about the interaction. Scores were not calculated for non-questioning aspects of interactions due to the range of possible responses based on the scenario specifics and previous research demonstrating a relationship between questioning and appropriate outcome.[18, 21]

Each scenario version had a given “appropriate outcome” or scenario angle that the pharmacy staff member should have achieved based on the information presented in the scenario (Table 1). The research team decided upon this outcome, in concordance with current best practice guidelines. For example, in the asthma scenario (online supplementary file 1) the staff member should have identified the patient’s frequent use of salbutamol indicating poorly controlled asthma and appropriately referred the patient to a medical practitioner.[29]

**Table 1: Example appropriate outcome for each scenario**

| Scenario                 | Appropriate outcome                                                                                        |
|--------------------------|------------------------------------------------------------------------------------------------------------|
| <b>Adult Cough/Cold</b>  | Identification of dextromethorphan-SSRI interaction and alternative product recommendation                 |
| <b>Adult Pain</b>        | Identification of duplication of therapy (ibuprofen and celecoxib)                                         |
| <b>Allergic Rhinitis</b> | Identification of trigger factors and appropriate treatment with an intranasal corticosteroid              |
| <b>Asthma</b>            | Identification of frequent salbutamol use and poorly controlled asthma, referral to a medical practitioner |
| <b>Diarrhoea</b>         | Identification of ‘red flag’ symptoms such as recent overseas travel, referral to a medical practitioner   |
| <b>Dyspepsia</b>         | Identification of ‘red flag’ symptoms such as frequent symptoms, referral to a medical practitioner        |
| <b>Insomnia</b>          | Counselling on sleep hygiene                                                                               |

|                              |                                                        |
|------------------------------|--------------------------------------------------------|
| <b>Paediatric Cough/Cold</b> | Refusal of supply of product for a child aged <6 years |
| <b>Paediatric Fever</b>      | Appropriate weight-based dosing                        |
| <b>Smoking Cessation</b>     | Identification of caffeine-cigarette smoke interaction |

### **data collation and analysis**

Data collection sheets were checked for consistency and completeness and entered into Microsoft Excel 2016 for Windows (Microsoft Corp, Redmond, WA, USA). A random sample of 10% of recordings were audited by the first author (JCC) to determine the level of discrepancy between the scoring and data collection by the mystery shoppers. This proportion of recordings was selected as the value to audit based on existing literature in this field.[30]

Data were then imported into IBM SPSS Statistics 24.0 (SPSS Inc., Chicago, IL, USA) and descriptively analysed and tests for normality and homogeneity of data were performed. Pearson's chi-squared analyses were performed to determine if there was a relationship between pharmacist involvement in the interaction (either by directly serving the shopper or being consulted by a non-pharmacist staff member) and achieving the appropriate outcome, and if there was a difference in the provision of written information between scenarios. Changes in median questioning scores over time were analysed using a Spearman's rank order correlation. Nonparametric independent-samples median tests were used to ascertain if the median questioning scores significantly differed across scenarios and between pharmacists and non-pharmacists. Point-biserial correlations were performed to determine if the proportion of interactions resulting in an appropriate outcome differed over the course of the nine visits.

A binary logistic regression model was developed to identify variables that were predictors of a scenario resulting in an appropriate outcome. Independent variables included in this model were whether a pharmacist was involved in the interaction, the questioning score, the visit number (1-9), the legislative status of the product requested, if the mystery shopper was identified by the pharmacy

1  
2  
3 staff, the pharmacy as a whole, and each individual scenario., Allergic rhinitis was selected as the  
4  
5 reference scenario for the purpose of the model as it had the lowest proportion of appropriate outcome  
6  
7 and was therefore deemed the poorest performing scenario. All independent variables were tested for  
8  
9 colinearity.  
10  
11  
12  
13  
14  
15  
16  
17  
18  
19  
20  
21  
22  
23  
24  
25  
26  
27  
28  
29  
30  
31  
32  
33  
34  
35  
36  
37  
38  
39  
40  
41  
42  
43  
44  
45  
46  
47  
48  
49  
50  
51  
52  
53  
54  
55  
56  
57  
58  
59  
60

For peer review only

## RESULTS

Sixty-one undergraduate pharmacy students completed 540 mystery shopping visits at 36 different community pharmacies across the Sydney metropolitan region from March-October in 2015. Of these visits, 521 (96%) were eligible for analysis. Reasons for exclusion of the remaining 19 visits included; the shopper being identified as a mystery shopper resulting in termination of the interaction (n=8), incomplete or missing datasheets (n=6), consent refused by the staff member (n=3), error by the mystery shopper during the interaction (n=1), and no stock of the requested product (n=1). Four of the excluded visits were from the allergic rhinitis scenario, three each from the diarrhoea, paediatric fever, and smoking cessation scenarios, two each from the adult cough/cold and adult pain scenarios, and one each from the dyspepsia and insomnia scenarios. Students were identified as mystery shoppers in 6% of cases (n=30). Of these 30 cases, in 22 instances it was not until the completion of the visit during the staff feedback that the staff revealed to the students that they had suspected they were a mystery shopper.

### outcome and questioning scores over time

An appropriate outcome was achieved in 54% (n=283) of analysed visits. The proportion of visits resulting in an appropriate outcome by scenario is reported in Table 2. Point-biserial correlations showed that the proportion of visits resulting in the appropriate outcome increased over the course of the nine visits across all scenarios ( $r_{pb}=0.192$ ;  $p<0.001$ ). When examining scenarios individually, an improvement over time was seen in the adult cough/cold scenario ( $r_{pb}=0.281$ ;  $p=0.044$ ), the allergic rhinitis scenario ( $r_{pb}=0.334$ ;  $p=.018$ ), the paediatric fever scenario ( $r_{pb}=0.356$ ;  $p=0.01$ ), and the smoking cessation scenario ( $r_{pb}=0.390$ ;  $p=0.005$ )(Table 2). Table 2 also outlines the proportions of visits resulting in the appropriate outcome by visit clusters (1-3, 4-6, 7-9) and overall.

**Table 2: Results of overall appropriate outcome over time by scenario**

| Scenario                            | Visits 1-3 | Visits 4-6 | Visits 7-9 | Overall | Improvement Over Time <sup>a</sup> |
|-------------------------------------|------------|------------|------------|---------|------------------------------------|
| <b>Adult Cough/Cold (n=52)</b>      | 17%        | 41%        | 53%        | 37%     | Yes (p=0.044)                      |
| <b>Adult Pain (n=52)</b>            | 67%        | 53%        | 71%        | 64%     | No (p=0.725)                       |
| <b>Allergic Rhinitis (n=50)</b>     | 6%         | 18%        | 27%        | 16%     | Yes (p=0.018)                      |
| <b>Asthma (n=54)</b>                | 50%        | 83%        | 78%        | 70%     | No (p=0.067)                       |
| <b>Diarrhoea (n=51)</b>             | 50%        | 65%        | 56%        | 57%     | No (p=0.427)                       |
| <b>Dyspepsia (n=53)</b>             | 78%        | 65%        | 67%        | 70%     | No (p=0.823)                       |
| <b>Insomnia (n=53)</b>              | 33%        | 77%        | 61%        | 57%     | No (p=0.073)                       |
| <b>Paediatric Cough/Cold (n=54)</b> | 72%        | 83%        | 78%        | 78%     | No (p=0.901)                       |
| <b>Paediatric Fever (n=51)</b>      | 47%        | 53%        | 94%        | 65%     | Yes (p=0.010)                      |
| <b>Smoking Cessation (n=51)</b>     | 12%        | 19%        | 50%        | 28%     | Yes (p=0.005)                      |
| <b>ALL (n=521)</b>                  | 43%        | 56%        | 64%        | 54%     | Yes (p<0.001)                      |

a = significance determined by point-biserial analyses, p<0.05

Overall median questioning scores were 44% (Range=0-100%, IQR=22-75%). Nonparametric independent-samples median tests determined that scores differed significantly across scenarios (p<0.001). Using Spearman's rank order correlations, questioning scores were found to improve over time ( $r_s=0.204$ ; p<0.001). When examining individual scenarios, questioning scores improved for the adult cough/cold scenario ( $r_s=0.404$ ; p=0.003), the adult pain scenario ( $r_s=0.362$ ; p=0.008), the asthma scenario ( $r_s=0.387$ ; p=0.004), and the paediatric fever scenario ( $r_s=0.430$ ; p=0.002). Table 3 outlines median questioning scores over time for each scenario and pooled scenario data.

Table 3: Median questioning scores and interquartile range over time by scenario

| Scenario                            | Visits 1-3          | Visits 4-6          | Visits 7-9           | Overall             | Improvement Over Time <sup>a</sup> |
|-------------------------------------|---------------------|---------------------|----------------------|---------------------|------------------------------------|
| <b>Adult Cough/Cold (n=52)</b>      | 37%<br>(IQR=25-67%) | 58%<br>(IQR=40-83%) | 64%<br>(IQR=50-83%)  | 58%<br>(IQR=33-83%) | Yes (p=0.003)                      |
| <b>Adult Pain (n=52)</b>            | 46%<br>(IQR=21-86%) | 57%<br>(IQR=43-79%) | 64%<br>(IQR=50-100%) | 57%<br>(IQR=39-86%) | Yes (p=0.008)                      |
| <b>Allergic Rhinitis (n=50)</b>     | 25%<br>(IQR=0-72%)  | 31%<br>(IQR=0-50%)  | 33% (IQR=0-50%)      | 28%<br>(IQR=0-50%)  | No (p=0.929)                       |
| <b>Asthma (n=54)</b>                | 30%<br>(IQR=14-64%) | 42%<br>(IQR=31-72%) | 62%<br>(IQR=36-86%)  | 44%<br>(IQR=25-72%) | Yes (p=0.004)                      |
| <b>Diarrhoea (n=51)</b>             | 44%<br>(IQR=19-81%) | 44%<br>(IQR=28-73%) | 44%<br>(IQR=25-66%)  | 44%<br>(IQR=25-70%) | No (p=0.707)                       |
| <b>Dyspepsia (n=53)</b>             | 50%<br>(IQR=25-81%) | 75%<br>(IQR=21-81%) | 75%<br>(IQR=13-89%)  | 63% (22-81%)        | No (p=0.198)                       |
| <b>Insomnia (n=53)</b>              | 44%<br>(IQR=25-63%) | 69%<br>(IQR=50-81%) | 56%<br>(IQR=25-78%)  | 56%<br>(IQR=33-78%) | No (p=0.274)                       |
| <b>Paediatric Cough/Cold (n=54)</b> | 22%<br>(IQR=14-50%) | 28%<br>(IQR=25-50%) | 38%<br>(IQR=25-50%)  | 30%<br>(IQR=19-50%) | No (p=0.227)                       |
| <b>Paediatric Fever (n=51)</b>      | 11%<br>(IQR=11-22%) | 39%<br>(IQR=17-56%) | 44%<br>(IQR=25-72%)  | 22%<br>(IQR=11-56%) | Yes (p=0.002)                      |
| <b>Smoking Cessation (n=51)</b>     | 44%<br>(IQR=22-83%) | 53%<br>(IQR=25-69%) | 58%<br>(IQR=28-94%)  | 56%<br>(IQR=22-78%) | No (p=0.290)                       |
| <b>ALL (n=521)</b>                  | 38%<br>(IQR=14-64%) | 50%<br>(IQR=25-72%) | 50%<br>(IQR=26-76%)  | 44%<br>(IQR=22-75%) | Yes (p<0.001)                      |

a = significance determined by Spearman's rank order correlations, p<0.05

### participating pharmacies and pharmacy staff

Half of the participating pharmacies in this study belonged to a chain or banner group (n=18). The majority of the pharmacies were located on a shopping strip (72%) and the remainder were in a shopping mall or similar.

1  
2  
3 The staff member(s) who interacted with the mystery shopper were recorded in all but one of the  
4 eligible visits (n=520/521). A pharmacist was involved in 72% (n=376) of the analysed interactions.

5  
6 The remaining 144 interactions were handled in isolation by a non-pharmacist staff member.

7  
8 Interactions without the involvement of a pharmacist resulted in the appropriate outcome being  
9 achieved in 33% of cases, whereas interactions with a pharmacist resulted in the appropriate outcome  
10 in 62% of cases. Pearson's chi-squared analyses found this to be a significant difference ( $\chi^2=35.04$ ;  
11 p<0.001).  
12  
13  
14  
15  
16

17  
18 Median questioning and total scores were also found to be significantly different between interactions  
19 with a pharmacist and those without (p<0.001). The median questioning score for interactions with a  
20 pharmacist were 50% (Range=0-100%, IQR=31-75%) vs. 25% (Range=0-100%, IQR=11-54%) for  
21 those without.  
22  
23  
24  
25

### 26 **regression model**

27  
28 The binary logistic regression model is shown in Table 4. The model returned a Nagelkerke R<sup>2</sup> value  
29 of 0.60. Involvement of the pharmacist in the interaction, the visit number, the questioning score, and  
30 the scenario type were all found to be significant positive predictors (p=0.008, p=0.022, p<0.001, and  
31 p<0.001 respectively) of achievement of the appropriate outcome i.e. providing an "appropriate"  
32 outcome for the mystery shopper. The legislative status of the product requested, if the shopper was  
33 identified by pharmacy staff, and the individual pharmacy were not found to be significant predictors.  
34  
35  
36  
37  
38  
39  
40  
41  
42  
43  
44  
45  
46  
47  
48  
49  
50  
51  
52  
53  
54  
55  
56  
57  
58  
59  
60  
As the pharmacy was not found to be significant this category was not broken down further.



**Table 4: Factors predicting appropriate outcome of mystery shopping scenarios – binary logistic regression model output (Nagelkerke R<sup>2</sup> = 0.60)**

| Variable                                        | $\beta$<br>Coefficient | OR     | 95% CI      |             | p-value             |
|-------------------------------------------------|------------------------|--------|-------------|-------------|---------------------|
|                                                 |                        |        | Lower Bound | Upper Bound |                     |
| Pharmacist involvement in interaction           | 0.398                  | 1.489  | 1.111       | 1.996       | 0.008 <sup>c</sup>  |
| Mystery shopping visit number (1-9)             | 0.110                  | 1.113  | 1.016       | 1.226       | 0.022 <sup>b</sup>  |
| Questioning score                               | 0.062                  | 1.063  | 1.050       | 1.077       | <0.001 <sup>d</sup> |
| Legislative status of product requested         | 0.186                  | 1.204  | 0.483       | 3.000       | 0.691               |
| Mystery shopper identified by pharmacy staff    | 0.405                  | 1.500  | 0.875       | 2.572       | 0.140               |
| Individual pharmacy <sup>a</sup>                | -0.010                 | 0.990  | 0.968       | 1.014       | 0.418               |
| Allergic rhinitis scenario (reference scenario) |                        |        |             |             | <0.001 <sup>d</sup> |
| Adult cough/cold scenario                       | 0.211                  | 1.235  | 0.381       | 4.005       | 0.752               |
| Adult pain scenario                             | 1.754                  | 5.779  | 1.307       | 25.555      | 0.021 <sup>b</sup>  |
| Asthma scenario                                 | 2.868                  | 17.596 | 3.762       | 82.301      | <0.001 <sup>d</sup> |
| Diarrhoea scenario                              | 2.072                  | 7.943  | 2.071       | 30.459      | 0.003 <sup>c</sup>  |
| Dyspepsia scenario                              | 2.900                  | 18.182 | 4.462       | 74.093      | <0.001 <sup>d</sup> |
| Insomnia scenario                               | 1.274                  | 3.576  | 0.813       | 15.740      | 0.092               |
| Paediatric cough/cold scenario                  | 4.463                  | 86.770 | 24.328      | 309.478     | <0.001 <sup>d</sup> |
| Paediatric fever scenario                       | 3.623                  | 37.437 | 10.723      | 130.699     | <0.001 <sup>d</sup> |
| Smoking cessation scenario                      | 0.024                  | 1.024  | 0.113       | 9.251       | 0.983               |

a = pharmacy was not broken down further due to not returning a significant value

b = significant at 0.05 level; c = significant at 0.01 level; d = significant at 0.001 level

## DISCUSSION

This study is the first to use the mystery shopping with feedback methodology across a large number of minor ailment scenarios with multiple repeated visits. The results from the 521 eligible visits demonstrated that multiple visits with feedback were associated with improvement in both the questioning scores of the pharmacy staff participants over time, as well as the proportion of visits achieving an appropriate outcome.

The apparent success of this intervention may be explained primarily by two factors, 1. the use of feedback as an interventional method, and 2. the anticipation of a mystery shopping visit. Existing literature in the area of audit and feedback,[13-15] in particular Kluger and DeNisi's Feedback Intervention Theory (FIT)[31] supports this hypothesis. This theory postulates that individuals compare their behaviour to the standard that is expected and when they identify that there is inconsistency between the two they alter their behaviour in order to achieve this benchmark.[14] The purpose of audit and feedback is to provide a means through which individuals can identify areas of their practice that do not meet expected standards, whilst also providing information on how to alter their focus and improve behaviour.[14] Several factors that have been identified through the FIT and meta-analyses of audit and feedback intervention studies[14] to be positive predictors of a successful audit and feedback intervention were used in this study. These include information about how to perform the task correctly, written feedback, monitoring change from a previous time period, and the provision of individual feedback.[14] Future mystery shopping interventions may wish to include other design aspects that have also been positively associated with successful interventions such as individual and group feedback, the provision of graphic materials, and goal setting.[14] Although FIT may explain the apparent success of the intervention, the dynamic between staff and students must be considered. The quality of the feedback provided by the students and the acceptability of this feedback to staff members have not yet been explored. Future work may wish to examine student feedback quality and acceptability. The provision of feedback to individual staff, as opposed to the entire pharmacy does mean that the study design relies on staff disseminating the information between themselves or the same staff member being shopped multiple times in order for the intervention to be

1  
2  
3 effective. Despite this, the facilitated self-reflection employed in this study through the use of the  
4  
5 scoresheets given to staff after the interaction has been shown to be a powerful tool in a previous  
6  
7 mystery shopping intervention study.[23]  
8

9  
10 The second factor suspected to contribute to the apparent success of the intervention is the notion that  
11  
12 the staff knew the mystery shopping program was taking place and were anticipating a mystery  
13  
14 shopping visit. It is speculated that this anticipation generates a Hawthorne effect whereby the staff  
15  
16 enter a state of “hypervigilance” and practice at optimal levels due to the possibility that they could be  
17  
18 assessed by a mystery shopper at any time.  
19

20  
21 It is interesting to note that whilst there was an overall improvement over time when the data are  
22  
23 pooled, it was not consistent between scenarios. Further investigation is warranted in targeting the  
24  
25 scenarios that performed less favourably to determine why this may have occurred. It is possible that  
26  
27 it may be either a result of the nature of the scenarios or the way they were designed by the research  
28  
29 team. The scenarios were all designed as direct-product requests, rather than symptom-based requests.  
30  
31 Direct-product requests have previously been shown to be negotiated more poorly by pharmacy  
32  
33 staff,[22, 32, 33] which may explain the poor results seen in some scenarios, but does not explain  
34  
35 inter-scenario differences.  
36

37  
38 Existing literature in this field reports contradictory results in regards to a pharmacist being involved  
39  
40 in the interaction and a correlation with a higher questioning score and subsequently an appropriate  
41  
42 outcome.[11, 22, 34] Previous mystery shopping intervention studies have also identified a correlation  
43  
44 between the number of questions asked and a successful outcome, both in the provision of salbutamol  
45  
46 for asthma[21] and antifungal medications for vaginal thrush.[18] Despite increased questioning  
47  
48 correlating to an appropriate outcome, research has suggested that not only is any questioning  
49  
50 important, but it is also important to consider the types of questions asked and if these questions lead  
51  
52 the staff member to an appropriate outcome.[5, 35] It has been suggested that protocols, such as  
53  
54 WWHAM in the United Kingdom,[36] may not be sufficient in isolation to take an accurate history,  
55  
56 arrive at the correct diagnosis, and make an appropriate recommendation, and the use of questions  
57  
58 targeted at the specific patient and scenario may be more likely to elicit a desirable outcome.[35-36] It  
59  
60

1  
2  
3 is interesting to note that in an Australian context, the WHAT-STOP-GO protocol is primarily  
4 targeted at non-pharmacist staff. Considering the lack of clinical background and speciality in  
5 medicines, the role of these protocols in training both pharmacists and other staff should be evaluated.  
6  
7 A recent study has suggested that encouraging patients to ask the pharmacist more questions about  
8 their medicine may result in the provision of more information and a longer consultation.[37] The  
9 feasibility of facilitating patient engagement with their pharmacist when requesting non-prescription  
10 medicines should be explored further.  
11  
12

13  
14  
15  
16  
17  
18 It is worthy to note the difference in results between each of the scenarios. In order to assess the  
19 efficacy of this intervention, scenarios were designed to be of a range of difficulties. In a separate  
20 study, using three of 10 scenarios in this dataset, the scenarios were designed explicitly to elicit  
21 mystery shopper referral to a medical practitioner (asthma, diarrhoea, and dyspepsia) and were not  
22 found to improve over time.[38] This may be due to these scenarios being more difficult and the role  
23 of referral not being engrained in day-to-day practice. The scenarios that performed most poorly in  
24 this study, allergic rhinitis and smoking cessation, may also be due to the difficult nature of the  
25 scenario design. In the smoking cessation scenario staff were required to identify an interaction  
26 between recent cessation of smoking and the decreased cytochrome P450-mediated metabolism of  
27 caffeine,[39] whereas in the allergic rhinitis scenario, staff were presented with a request for an  
28 antihistamine and expected to “step up” the patient to an intra-nasal corticosteroid as recommended  
29 by current guidelines.[40] Despite the initial low scores of these scenarios, improvement was seen  
30 over time with repeated mystery shopping visits and feedback. It is important to note that this study  
31 did not examine if the staff made *inappropriate* recommendations, but whether or not the staff  
32 achieved the “gold standard” outcome as determined by the pharmacist research team when writing  
33 the scenarios. Due to variability in scenario performance, particularly in these more difficult  
34 scenarios, future interventions may want to focus on specific topic areas. Further work is also needed  
35 to determine why pharmacy staff are performing differently in these situations.  
36  
37  
38  
39  
40  
41  
42  
43  
44  
45  
46  
47  
48  
49  
50  
51  
52  
53

54  
55 The strengths of this study lie in the large number of visits included in the analysis and the variety of  
56 scenarios used. However, this study is limited by several factors. The nature of the mystery shopper  
57  
58  
59  
60

1  
2  
3 methodology means that it is never truly possible to determine what happens with real patients and  
4  
5 how interactions with pharmacy staff may shape their health outcomes in the future. Instead, surrogate  
6  
7 markers such as an appropriate outcome must be relied upon. Despite the large number of visits, these  
8  
9 were restricted to the metropolitan region of Sydney and may not be generalisable to the rest of  
10  
11 Australia or the world. Although staff identification of the mystery shopper was not frequently  
12  
13 reported, it is possible that this was under-reported and this may have impacted how the staff handled  
14  
15 the mystery shoppers' requests. Likewise, the staff were aware that the study was taking place, and  
16  
17 despite the staff not knowing the exact timing of the visits, the likelihood of future visits would have  
18  
19 become apparent after the initial visit and feedback session. Pharmacies were also able to keep the  
20  
21 cost of any sales made to the mystery shoppers which again may have influenced practice. The  
22  
23 datasheet used in this study has not been validated for use in this setting, and despite a proportion of  
24  
25 recordings being audited against the recorded scores, it cannot be guaranteed that the written  
26  
27 recording of data by student mystery shoppers was completely accurate in all cases. The voluntary  
28  
29 nature of participation for the pharmacies may also have resulted in the pharmacies that are already  
30  
31 more likely to perform better. Limitations in the ability to identify whether a single staff member was  
32  
33 involved in a mystery shopping interaction on multiple occasions, and exactly who served the mystery  
34  
35 shopper at first must also be considered when interpreting the results of this study.  
36  
37  
38  
39  
40

## 41 CONCLUSION

42  
43 Mystery shopping with feedback across multiple visits were associated with improved pharmacy staff  
44  
45 performance over time. Multiple visits, pharmacist involvement, increased questioning, and the  
46  
47 prescribed scenario were predictors of a visit resulting in an appropriate outcome. Mystery shopping  
48  
49 with feedback should be explored as a means to train pharmacy staff in an appropriate provision of  
50  
51 non-prescription medicines to ensure optimal patient outcomes. Success in the field of pharmacy may  
52  
53 warrant exploring the use of this methodology in other healthcare settings. Future interventions should  
54  
55 focus on the contribution of non-pharmacist staff to patient care and design interventions to better  
56  
57 target this population.  
58  
59  
60

## ACKNOWLEDGEMENTS

The authors wish to acknowledge all of the Bachelor of Pharmacy students, and pharmacy staff who participated in this study.

## AUTHOR CONTRIBUTIONS

CRS, ACDN and RJM conceived the study design. CRS, FW and RJM coordinated the study. JCC, CRS, FW, ACDN and RJM trained students. FW designed scenarios. JCC and CLN completed data collection and data entry. JCC, CRS and RJM conducted data analysis and interpretation of results. JCC drafted the manuscript. All authors contributed to critical revision of the manuscript and approved the final manuscript for submission.

## COMPETING INTERESTS

The authors have no competing interests to declare.

## FUNDING

This work was supported by the Australian Government Office for Learning and Teaching [grant number SD14-4207]; the Pharmacy Council of NSW [grant number G176927]; and Alphapharm Pty Ltd [grant number G176862]. The sponsors had no role in the conception and development of the study; collection, analysis or interpretation of data; writing of this report; or the decision to submit this report for publication.

## DATA SHARING STATEMENT

Raw dataset available online from LabArchives via the following DOI:

<http://dx.doi.org/10.6070/H4BK19ST>

1  
2  
3  
4  
5  
6  
7  
8  
9  
10  
11  
12  
13  
14  
15  
16  
17  
18  
19  
20  
21  
22  
23  
24  
25  
26  
27  
28  
29  
30  
31  
32  
33  
34  
35  
36  
37  
38  
39  
40  
41  
42  
43  
44  
45  
46  
47  
48  
49  
50  
51  
52  
53  
54  
55  
56  
57  
58  
59  
60  
**REFERENCE LIST**

1 Grime J, Blenkinsopp A, Raynor DK, et al. The role and value of written information for patients about individual medicines: a systematic review. *Health Expect* 2007;10(3):286-98.

2 Watts A, Castleman L, Phillips BB. Impact of a community pharmacist on patient knowledge of NPMs. *J Pharm Technol* 2010;26(3):111-5.

3 Hong SH, Spadaro D, West D, et al. Patient valuation of pharmacist services for self care with OTC medications. *J Clin Pharm Ther* 2005;30(3):193-9.

4 Gauld NJ, Kelly FS, Kurosawa N, et al. Widening consumer access to medicines through switching medicines to non-prescription: a six country comparison. *PLOS ONE* 2014;9(9):e107726.

5 Rutter PM, Horsley E, Brown DT. Evaluation of community pharmacists' recommendations to standardized patient scenarios. *Ann Pharmacother* 2004;38(6):1080-5.

6 Rutter P. Role of community pharmacists in patients' self-care and self-medication. *Integr Pharm Res Pract* 2015;4:57-65.

7 Bradley CP, Bond C. Increasing the number of drugs available over the counter: arguments for and against. *Br J Gen Pract* 1995;45:4.

8 Hughes CM, McElnay JC, Fleming GF. Benefits and risks of self medication. *Drug Saf* 2001;24(14):1027-37.

9 Ngwerume K, Watson M, Bond C, et al. An evaluation of an intervention designed to improve the evidence-based supply of non-prescription medicines from community pharmacies. *Int J Pharm Pract* 2014;23(2):102-10.

10 Coelho RB, da Costa FA. Impact of pharmaceutical counseling in minor health problems in rural Portugal. *Pharm Pract* 2014;12(4):451.

11 Watkins K, Wood H, Schneider CR, et al. Effectiveness of implementation strategies for clinical guidelines to community pharmacy: a systematic review. *Implement Sci* 2015;10(1).

- 1  
2  
3 12 Foy R, Eccles M, Jamtvedt G, et al. What do we know about how to do audit and feedback?  
4  
5 Pitfalls in applying evidence from a systematic review. *BMC Health Serv Res* 2005;5(1):50.  
6  
7 13 Ivers N, Jamtvedt G, Flottorp S, et al. Audit and feedback: effects on professional practice and  
8  
9 healthcare outcomes. *Cochrane Database Syst Rev* doi: 10.1002/14651858.CD000259.pub3.  
10  
11 14 Hysong SJ, Kell HJ, Petersen LA, et al. Theory-based and evidence-based design of audit and  
12  
13 feedback programmes: examples from two clinical intervention studies. *BMJ Qual Saf*  
14  
15 2017;26(4):323-34.  
16  
17 15 Hysong SJ. Meta-Analysis: Audit & feedback features impact effectiveness on care quality. *Med*  
18  
19 *Care* 2009;47(3):356-63.  
20  
21 22 16 Xu T, de Almeida Neto AC, Moles RJ. A systematic review of simulated-patient methods used in  
23  
24 community pharmacy to assess the provision of non-prescription medicines. *Int J Pharm Pract*  
25  
26 2012;20(5):307-19.  
27  
28 29 17 de Almeida Neto AC, Kelly F, Benrimoj SI. Shaping practice behaviour: novel training  
30  
31 methodology. *Int J Pharm Pract* 2001;9(3):203-10.  
32  
33 34 18 Watson MC. Factors predicting the guideline compliant supply (or non-supply) of non-  
35  
36 prescription medicines in the community pharmacy setting. *Qual Saf Health Care* 2006;15(1):53-7.  
37  
38 39 19 Watson MC, Cleland JA, Bond CM. Simulated patient visits with immediate feedback to improve  
40  
41 the supply of over-the-counter medicines: a feasibility study. *Fam Pract* 2009;26(6):532-42.  
42  
43 44 20 Berger K, Eickhoff C, Schulz M. Counselling quality in community pharmacies: implementation of  
45  
46 the pseudo customer methodology in Germany. *J Clin Pharm Ther* 2005;30(1):45-57.  
47  
48 49 21 Schneider CR, Everett AW, Geelhoed E, et al. Intern pharmacists as change agents to improve the  
50  
51 practice of nonprescription medication supply: provision of salbutamol to patients with asthma. *Ann*  
52  
53 *Pharmacother* 2010;44(7-8):1319-26.  
54  
55 56 22 Horvat N, Koder M, Kos M. Using the simulated patient methodology to assess paracetamol-  
57  
58 related counselling for headache. *PLOS ONE* 2012;7(12):e52510.  
59  
60



1  
2  
3 23 Xu T, de Almeida Neto AC, Moles RJ. Simulated caregivers: their feasibility in educating pharmacy  
4 staff to manage children's ailments. *Int J Clin Pharm*. 2012;34(4):587-95.

5  
6  
7 24 Benrimoj SI, Werner JB, Raffaele C, et al. A system for monitoring quality standards in the  
8 provision of non-prescription medicines from Australian community pharmacies. *Pharm World Sci*  
9 2007;30(2):147-53.

10  
11  
12 25 Benrimoj SI, Werner JB, Raffaele C, et al. Monitoring quality standards in the provision of non-  
13 prescription medicines from Australian community pharmacies: results of a national programme.  
14 *Qual Saf Health Care* 2007;16(5):354-8.

15  
16  
17 26 Therapeutic Goods Administration. The Poisons Standard No. 16 Canberra: Australian  
18 Government; 2017. Available from: <https://www.legislation.gov.au/Details/F2017L00057>. Accessed  
19 July 2017.

20  
21  
22 27 Collins JC, Schneider CR, Wilson F, et al. Community pharmacy modifications to non-prescription  
23 medication requests: a simulated patient study. *Res Soc Adm Pharm* Published online first: 22 May  
24 2017. doi: 10.1016/j.sapharm.2017.05.007.

25  
26  
27 28 Pharmaceutical Society of Australia. Standards for the provision of pharmacy medicines and  
28 pharmacist only medicines in community pharmacy Canberra: Pharmaceutical Society of Australia;  
29 2006. Available from: <http://www.psa.org.au/download/standards/s2s3-standards.pdf>. Accessed  
30 July 2017.

31  
32  
33 29 National Asthma Council Australia. Australian Asthma Handbook, Version 1.2 Melbourne:  
34 National Asthma Council Australia; 2016. Available from: <http://www.astmahandbook.org.au>.  
35 Accessed October 2017.

36  
37  
38 30 Werner JB, Benrimoj SI. Audio taping simulated patient encounters in community pharmacy to  
39 enhance the reliability of assessments. *Am J Pharm Educ* 2008;72(6):136.

40  
41  
42 31 Kluger AN, DeNisi A. The effects of feedback Interventions on performance: a historical review, a  
43 meta-analysis, and a preliminary feedback intervention theory. *Psychol Bull* 1996;119(2):254-84.

- 1  
2  
3 32 Kelly FS, Williams KA, Benrimoj SI. Does advice from pharmacy staff vary according to the  
4  
5 nonprescription medicine requested? *Ann Pharmacother* 2009;43(11):1877-86.  
6  
7 33 Langer B, Bull E, Burgsthaler T, et al. Assessment of counselling for acute diarrhoea in German  
8  
9 pharmacies: a simulated patient study. *Int J Pharm Pract* Published online first: 19 September 2017.  
10  
11 doi: 10.1111/ijpp.12405.  
12  
13 34 Kashyap K, Nissen L, Smith S, et al. Management of over-the-counter insomnia complaints in  
14  
15 Australian community pharmacies: a standardized patient study. *Int J Pharm Pract* 2014;22(2):125-  
16  
17 34.  
18 35 Akhtar S, Rutter P. Pharmacists thought processes in making a differential diagnosis using a  
19  
20 gastro-intestinal case vignette. *Res Soc Adm Pharm* 2015;11(3):472-9.  
21  
22 36 Rutter PM, Patel J. Decision making by community pharmacists when making an over-the-counter  
23  
24 diagnosis in response to a dermatological presentation. *SelfCare* 2013;4(6):125-33.  
25  
26 37 Peters J, Desai K, Ricci D, et al. The power of the patient question: A secret shopper study. *Patient*  
27  
28 *Educ Couns* 2016;99(9):1526-33.  
29  
30 38 Collins JC, Schneider CR, Faraj R, et al. Management of common ailments requiring referral in the  
31  
32 pharmacy: a mystery shopping intervention study. *Int J Clin Pharm* 2017;39(4):697-703.  
33  
34 39 Bittoun R. The influence of caffeine on smoking cessation: a case presentation. *Journal of Smok*  
35  
36 *Cess* 2010;5(2):iii.  
37  
38 40 Brožek JL, Bousquet J, Baena-Cagnani CE, et al. Allergic Rhinitis and its impact on asthma (ARIA)  
39  
40 guidelines: 2010 revision. *J Allergy Clin Immunol* 2010;126(3):466-76.  
41  
42  
43  
44  
45  
46  
47  
48  
49  
50  
51  
52  
53  
54  
55  
56  
57  
58  
59  
60

## WALKING IN CONSUMERS SHOES: SEM 2 DATA COLLECTION FORM

| SCENARIO TEN                                | VERSION EIGHT                                                                                                                                                                                                                                                                                               |
|---------------------------------------------|-------------------------------------------------------------------------------------------------------------------------------------------------------------------------------------------------------------------------------------------------------------------------------------------------------------|
| Product requested                           | VENTOLIN® [Salbutamol]                                                                                                                                                                                                                                                                                      |
| Who is the patient?                         | Self                                                                                                                                                                                                                                                                                                        |
| How long:                                   | Had asthma since you were a child                                                                                                                                                                                                                                                                           |
| Actual Symptoms – what are they?            | Wheezy during the day                                                                                                                                                                                                                                                                                       |
| Treatment for this or any other conditions? | Take puffer (Ventolin®) three or four times a day when you feel wheezy. Helps for a little while.<br><br>If asked you are not coughing at night.                                                                                                                                                            |
| Additional Info                             | Think you only have mild asthma that is under control. Do not realise that you are overusing your puffer. Do have a Seretide® [fluticasone propionate/salmeterol] inhaler somewhere, not using it at the moment.<br><br>No asthma management plan. Haven't discussed asthma with a doctor for a year or so. |
| Have you used it before?                    | Yes.                                                                                                                                                                                                                                                                                                        |
| SCENARIO ANGLE                              | Refer to medical practitioner - poorly controlled asthma, no preventer use, and no asthma management plan.                                                                                                                                                                                                  |

|                      |  |
|----------------------|--|
| PHARMACY NAME AND ID |  |
| STUDENT NAME AND ID  |  |
| VISIT DATE           |  |
| VISIT TIME           |  |

| WHO SERVED YOU?                                         |   |   |
|---------------------------------------------------------|---|---|
| Pharmacy assistant?                                     | Y | N |
| Pharmacist?                                             | Y | N |
| Did the assistant ask the pharmacist for advice?        | Y | N |
| Did the assistant refer the customer to the pharmacist? | Y | N |
| Notes:                                                  |   |   |
|                                                         |   |   |

## STUDENT FEEDBACK FORM (SCENARIO TEN)

| WHAT: DID THEY FIND OUT?                                                       |      |          |              |     |  |
|--------------------------------------------------------------------------------|------|----------|--------------|-----|--|
| W: Who the medicine was for?                                                   |      |          |              |     |  |
| Self                                                                           | Y    | N        | Part         | N/A |  |
| H: How long you'd had the symptoms?                                            |      |          |              |     |  |
| Years – diagnosed with asthma as a child                                       | Y    | N        | Part         | N/A |  |
| A: About the actual symptoms?                                                  |      |          |              |     |  |
| Wheezy during day                                                              | Y    | N        | Part         | N/A |  |
| T: About treatment for this or any other condition?                            |      |          |              |     |  |
| What treatment you'd already tried? (Regular salbutamol use)                   | Y    | N        | Part         | N/A |  |
| Was the treatment successful? (Moderately)                                     | Y    | N        | Part         | N/A |  |
| If you take any other medication? (Have Seretide® – don't use it)              | Y    | N        | Part         | N/A |  |
| If you have any other medical conditions? (None)                               | Y    | N        | Part         | N/A |  |
| STOP: DID THEY STOP AND?                                                       |      |          |              |     |  |
| Consider the issue? (Poorly controlled asthma/no asthma management plan)       | Y    | N        | Part         | N/A |  |
| GO: DID THEY?                                                                  |      |          |              |     |  |
| Address the issue?                                                             |      |          |              |     |  |
| Refer to GP for review                                                         | Y    | N        | Part         | N/A |  |
| Suggest a review of asthma management plan                                     | Y    | N        | Part         | N/A |  |
| Other? (please record here)                                                    |      |          |              |     |  |
| Recommend/provide any <b>products</b> ?                                        | Y    | N        | Part         | N/A |  |
| Record Product Name/s and Strength:                                            |      |          |              |     |  |
| For each product they recommended/provided, did they:                          |      |          |              |     |  |
| Recommend an appropriate dose and dosage interval?                             | Y    | N        | Part         | N/A |  |
| Recommend how long to use the product for?                                     | Y    | N        | Part         | N/A |  |
| Provide relevant <b>verbal advice</b> on asthma management?                    | Y    | N        | Part         | N/A |  |
| Record type of Verbal Advice                                                   |      |          |              |     |  |
| Provide relevant <b>written advice</b> ? (please attach to this form)          | Y    | N        | Part         | N/A |  |
| Provide appropriate <b>follow-on advice</b> ?                                  |      |          |              |     |  |
| Refer you to the doctor for the presenting symptoms?                           | Y    | N        | Part         | N/A |  |
| Tell the customer when to return to the pharmacy?                              | Y    | N        | Part         | N/A |  |
| Tell the customer when to visit the doctor (e.g. if it persists)?              | Y    | N        | Part         | N/A |  |
| Record any specific Follow-on advice (i.e. advice on WHAT to do next and WHEN) |      |          |              |     |  |
| OVERALL                                                                        |      |          |              |     |  |
| Do you think the visit had an <b>appropriate outcome</b> ?                     | Y    | N        | Part         | N/A |  |
| Do you think they established a <b>good rapport</b> with you?                  | Y    | N        | Part         | N/A |  |
| How would you rate the information they provided?                              | Good | Adequate | Not Adequate |     |  |
| Do you have any comments?                                                      |      |          |              |     |  |

## COUNSELLOR FEEDBACK FORM (SCENARIO TEN)

| WHAT: DID YOU FIND OUT?                                                        |      |          |              |     |
|--------------------------------------------------------------------------------|------|----------|--------------|-----|
| W: Who the medicine was for?                                                   |      |          |              |     |
| Self                                                                           | Y    | N        | Part         | N/A |
| H: How long they'd had the symptoms?                                           |      |          |              |     |
| Years – diagnosed with asthma as a child                                       | Y    | N        | Part         | N/A |
| A: About the actual symptoms?                                                  |      |          |              |     |
| Wheezy during day                                                              | Y    | N        | Part         | N/A |
| T: About treatment for this or any other condition?                            |      |          |              |     |
| What treatment they'd already tried? (Regular salbutamol use)                  | Y    | N        | Part         | N/A |
| Was the treatment successful? (Moderately)                                     | Y    | N        | Part         | N/A |
| If they take any other medication? (Have Seretide® – don't use it)             | Y    | N        | Part         | N/A |
| If they have any other medical conditions? (None)                              | Y    | N        | Part         | N/A |
| STOP: DID YOU STOP AND?                                                        |      |          |              |     |
| Consider the issue? (Poorly controlled asthma/no asthma management plan)       | Y    | N        | Part         | N/A |
| GO: DID YOU?                                                                   |      |          |              |     |
| Address the issue?                                                             |      |          |              |     |
| Refer to GP for review                                                         | Y    | N        | Part         | N/A |
| Suggest a review of asthma management plan                                     | Y    | N        | Part         | N/A |
| Other? (please record here)                                                    |      |          |              |     |
| Recommend/provide any <b>products</b> ?                                        | Y    | N        | Part         | N/A |
| Record Product Name/s and Strength:                                            |      |          |              |     |
| For each product you provided, did you:                                        |      |          |              |     |
| Recommend an appropriate dose and dosage interval?                             | Y    | N        | Part         | N/A |
| Recommend how long to use the product for?                                     | Y    | N        | Part         | N/A |
| Provide relevant <b>verbal advice</b> on asthma management?                    | Y    | N        | Part         | N/A |
| Record type of Verbal Advice                                                   |      |          |              |     |
| Provide relevant <b>written advice</b> ? (please attach to this form)          | Y    | N        | Part         | N/A |
| Provide appropriate <b>follow-on advice</b> ?                                  |      |          |              |     |
| Refer the customer to the doctor for the presenting symptoms?                  | Y    | N        | Part         | N/A |
| Tell the customer when to return to you?                                       | Y    | N        | Part         | N/A |
| Tell the customer when to visit the doctor (e.g. if it persists)?              | Y    | N        | Part         | N/A |
| Record any specific Follow-on advice (i.e. advice on WHAT to do next and WHEN) |      |          |              |     |
| OVERALL                                                                        |      |          |              |     |
| Do you think the visit had an <b>appropriate outcome</b> ?                     | Y    | N        | Part         | N/A |
| Do you think you established a <b>good rapport</b> with the customer?          | Y    | N        | Part         | N/A |
| How would you rate the information you provided?                               | Good | Adequate | Not Adequate |     |
| Do you have any comments?                                                      |      |          |              |     |
